# Supplementary material
Source: HighWire-hosted journal article supplement (http://gut.bmj.com/highwire/filestream/192592/field_highwire_adjunct_files/1/55121717webonytable.xls)
Supplement: 55121717webonytable.xls [file 55121717webonytable.xls]

## Sheet: All
Accession #	Unicode-ID	Gene Name	Pre Treatment (Average)	Post Treatment (Average)	P values (Wilcoxon)	Fold Change
AK026546	Hs.89714	Chemokine (C-X-C motif) ligand 5	1.95386	0.06904	0.0284	-23.7524
NM_000584	Hs.624	Interleukin 8	1.28591	0.09875	0.0001	-12.8171
BC039517	Hs.134882	Hypothetical protein LOC285205	0.15274	0.01755	0.0166	-7.78124
AK096293	Hs.546480	Amyotrophic lateral sclerosis 2 (juvenile) chromosome region, candidate 16	0.15472	0.03217	0.0093	-6.45313
BC026298	Hs.543330	CDNA clone IMAGE:4274877, partial cds	0.22016	0.05746	0.0069	-6.10504
NM_173665	Hs.425123	Hypothetical protein MGC34713	0.16413	0.0152	0.0218	-6.10504
U25801	Hs.445061	Vac14 homolog (S. cerevisiae)	0.18619	0.04027	0.0093	-6.02099
BF032500	Hs.552739	Homo sapiens, clone IMAGE:4513167, mRNA	0.13857	0.03209	0.0069	-5.9794
NM_002580	Hs.423	Regenerating islet-derived 3 alpha	9.70266	0.97207	0.0125	-5.9794
AL041761	Hs.280387	Homo sapiens, clone IMAGE:4753714, mRNA	0.78951	0.66146	0.218	-5.73582
BC040883	Hs.434660	Hypothetical protein LOC285045	0.16371	0.05169	0.0125	-5.6962
BC029578	Hs.547654	Homo sapiens, clone IMAGE:5268630, mRNA	0.11585	0.03288	0.0051	-5.65685
AI678049	Hs.448583	DKFZP434B061 protein	0.0934	0.07055	0.0051	-5.38893
NM_002274	Hs.463032	Keratin 13	0.3615	0.11667	0.0218	-5.27803
BF215018	Hs.252451	Sema domain, immunoglobulin domain (Ig), short basic domain, secreted, (semaphorin) 3A	0.09815	0.04581	0.0745	-5.27803
AA948608	Hs.413434	Solute carrier family 39 (zinc transporter), member 10	0.15241	0.04286	0.0367	-5.27803
NM_018402	Hs.272350	Interleukin 26	0.15729	0.03858	0.0367	-5.09824
NM_145653	Hs.515381	Transcription elongation factor B polypeptide 3C (elongin A3)	0.07001	0.02024	0.0745	-5.09824
BF062364	Hs.129832	Putative olfactory receptor (clone ht2)	0.15465	0.06637	0.1141	-5.06303
AU155384	Hs.518760	FIP1 like 1 (S. cerevisiae)	0.089	0.02438	0.0166	-4.99332
AW469573	Hs.509343	Pleckstrin homology domain containing, family C (with FERM domain) member 1	0.10439	0.0301	0.0218	-4.95883
AU145191	Hs.420016	Sodium- and chloride-activated ATP-sensitive potassium channel	0.17963	0.04623	0.0051	-4.95883
AI798164	Hs.140903	Mindbomb homolog 1 (Drosophila)	0.27757	0.07535	0.0069	-4.89056
NM_080475	Hs.350958	Serine (or cysteine) proteinase inhibitor, clade B (ovalbumin), member 11	0.14784	0.06569	0.0926	-4.89056
AU148391	Hs.181245	LEM domain containing 1	0.15488	0.03674	0.0051	-4.69134
AL833811	Hs.376811	MRNA; cDNA DKFZp564G203 (from clone DKFZp564G203)	0.13127	0.02119	0.0469	-4.65893
AK022786	Hs.10499	Amino acid transporter	0.1308	0.02573	0.0218	-4.62675
BC001517	Hs.234786	Thioesterase, adipose associated	0.20004	0.03503	0.0069	-4.62675
X67513	Hs.96094	Cholinergic receptor, nicotinic, beta polypeptide 3	0.22797	0.02663	0.0125	-4.59479
AL832535	Hs.12513	Hypothetical protein LOC157627	0.13614	0.05271	0.0284	-4.59479
NM_015515	Hs.9029	Keratin 23 (histone deacetylase inducible)	0.17964	0.0448	0.0218	-4.53154
NM_002358	Hs.533185	MAD2 mitotic arrest deficient-like 1 (yeast)	0.38442	0.13588	0.0069	-4.53154
AI655311	Hs.136697	Transcribed locus	0.24388	0.20197	0.0218	-4.53154
NM_015715	Hs.149623	Phospholipase A2, group III	0.56403	0.10402	0.0125	-4.50023
AI080364	Hs.211612	SEC24 related gene family, member A (S. cerevisiae)	0.13152	0.04323	0.0125	-4.50023
BC006404	Hs.523877	Suppressor of potassium transport defect 3	0.32258	0.05718	0.0051	-4.46915
AK095053	Hs.434163	Chromosome 18 open reading frame 30	0.2261	0.06315	0.0125	-4.43828
BC022431	Hs.352357	Homo sapiens, clone IMAGE:4276820, mRNA	0.07264	0.02068	0.0367	-4.43828
BF940761	Hs.27621	Clone TUA8 Cri-du-chat region mRNA	0.18535	0.05844	0.0284	-4.40762
BF216535	Hs.280388	Nephronophthisis 1 (juvenile)	0.27254	0.08746	0.0051	-4.37717
AW183188	Hs.478095	WD repeat domain 56	0.18277	0.03274	0.0284	-4.37717
H17817	Hs.416061	Phosphodiesterase 1A, calmodulin-dependent	0.19955	0.06474	0.0284	-4.34694
AI888178	Hs.374596	Tumor protein, translationally-controlled 1	0.29874	0.13341	0.0469	-4.34694
AI806586	Hs.21938	Nardilysin (N-arginine dibasic convertase)	0.16298	0.05179	0.0469	-4.25748
AU147528	Hs.98910	Raft-linking protein	0.08229	0.02657	0.1394	-4.25748
BC040474	Hs.98594	Rho guanine nucleotide exchange factor (GEF) 10	0.31455	0.12073	0.0051	-4.25748
BG531853	Hs.555913	Serologically defined colon cancer antigen 8	0.21275	0.08117	0.0051	-4.25748
NM_030953	Hs.169333	Tigger transposable element derived 6	0.154	0.0411	0.0367	-4.25748
S71486	Hs.495912	Dystrophin (muscular dystrophy, Duchenne and Becker types)	0.07564	0.03152	0.2026	-4.22807
BC037802	Hs.385753	Homo sapiens, clone IMAGE:4796629, mRNA	0.21016	0.04403	0.0125	-4.22807
NM_017768	Hs.147836	Hypothetical protein FLJ20331	0.21839	0.07609	0.0069	-4.22807
AK055863	Hs.548966	Hypothetical protein LOC157273	0.1633	0.05607	0.1688	-4.22807
NM_017645	Hs.533468	Family with sequence similarity 29, member A	0.12639	0.05187	0.0367	-4.19887
BF029081	Hs.436424	Hypothetical protein MGC39715	0.54712	0.22651	0.0284	-4.19887
N24610	Hs.17267	Chromosome 9 open reading frame 93	0.09396	0.05209	0.1141	-4.16986
AK026881	Hs.506381	FYVE, RhoGEF and PH domain containing 6	0.08324	0.03333	0.0745	-4.16986
W74442	Hs.513126	Hypothetical protein FLJ10719	0.12471	0.01634	0.0284	-4.16986
N64762	Hs.49053	CDNA FLJ36588 fis, clone TRACH2013991	0.27131	0.07999	0.0166	-4.14106
AI878997	Hs.290259	THAP domain containing 5	0.08244	0.01692	0.0469	-4.14106
AF086084	Hs.483136	COMM domain containing 10	0.1922	0.05487	0.0284	-4.11246
BF590131	Hs.87889	Dicer1, Dcr-1 homolog (Drosophila)	0.20672	0.10083	0.0745	-4.11246
AA431623	Hs.381406	GLB2 gene, upstream regulatory region	0.12766	0.02154	0.0284	-4.11246
AW295407	Hs.497642	Hypothetical protein FLJ25078	0.31293	0.10564	0.0469	-4.11246
BG479112	Hs.140666	F-box protein 36	0.12365	0.02205	0.0284	-4.08405
NM_001062	Hs.2012	Transcobalamin I (vitamin B12 binding protein, R binder family)	2.01507	0.63636	0.0593	-4.08405
BF439204	Hs.494204	Hypothetical protein DKFZp434N2030	0.22659	0.0883	0.0284	-4.05584
BI713506	Hs.532056	WD repeat domain 17	0.07829	0.02992	0.0051	-4.05584
BC043553	Hs.434262	Hypothetical protein LOC339822	0.18046	0.05079	0.0093	-4.02782
NM_014438	Hs.278909	Interleukin 1 family, member 8 (eta)	0.28959	0.09628	0.0125	-4.02782
AI655887	Hs.118228	Transcribed locus	0.56269	0.48436	0.0166	-4.02782
BE467675	Hs.525163	Homo sapiens, clone IMAGE:4822875, mRNA	0.20937	0.05582	0.0125	-4
AF454553	Hs.269059	Jumonji, AT rich interactive domain 2	0.13803	0.03954	0.0284	-4
AW102570	Hs.504670	KIAA1238 protein	0.1622	0.05181	0.0218	-4
AI630997	Hs.269654	M-phase phosphoprotein, mpp8	0.11615	0.11633	0.0284	-3.97237
AW081879	Hs.108049	Uveal autoantigen with coiled-coil domains and ankyrin repeats	0.17498	0.06722	0.0166	-3.97237
BE552137	Hs.370303	Zinc finger protein 366	0.18344	0.05922	0.0093	-3.97237
AA151838	Hs.185774	Eyes absent homolog 3 (Drosophila)	0.29409	0.0773	0.0125	-3.94493
AL049782	Hs.184938	Hypothetical gene CG012	0.56898	0.16126	0.5751	-3.94493
H15261	Hs.470791	Zinc finger protein 533	0.14133	0.03474	0.0745	-3.94493
BC010901	Hs.444028	Cytoskeleton associated protein 2	0.18944	0.06686	0.0469	-3.91768
AF063002	Hs.435369	Four and a half LIM domains 1	0.22626	0.10649	0.0093	-3.91768
NM_018488	Hs.143907	T-box 4	0.21139	0.06848	0.0166	-3.91768
AI276956	Hs.113631	Transcribed locus, weakly similar to NP_062553.1 hypothetical protein FLJ11267 [Homo sapiens]	0.19589	0.05638	0.0166	-3.91768
AA504346	Hs.439713	Zinc finger protein 154 (pHZ-92)	0.20174	0.06563	0.0469	-3.91768
AW975728	Hs.439643	Solute carrier family 16 (monocarboxylic acid transporters), member 7	0.17456	0.05715	0.0367	-3.89062
NM_002090	Hs.89690	Chemokine (C-X-C motif) ligand 3	1.26914	0.24345	0.0166	-3.86375
AK024952	Hs.489190	Solute carrier family 25, member 13 (citrin)	0.06041	0.05136	0.1394	-3.86375
AU150869	Hs.547789	CDNA FLJ14180 fis, clone NT2RP2003799	0.18536	0.05603	0.0093	-3.83706
AF295726	Hs.464442	Chromosome 18 open reading frame 2	0.14476	0.04732	0.1141	-3.83706
AA618420	Hs.378836	Hook homolog 1 (Drosophila)	0.17677	0.05116	0.0125	-3.83706
R70029	Hs.103555	Hypothetical protein FLJ14775	0.14766	0.04876	0.0367	-3.81055
AU145112	Hs.509113	Neuronal PAS domain protein 3	0.18189	0.07255	0.0125	-3.81055
BC023578	Hs.370267	Tankyrase, TRF1-interacting ankyrin-related ADP-ribose polymerase	0.10499	0.03146	0.0051	-3.81055
AV722510	Hs.5461	Transcribed locus, weakly similar to NP_060190.1 signal-transducing adaptor protein-2; brk kinase substrate [Homo sapiens]	0.10108	0.04272	0.0284	-3.81055
AF211481	Hs.480848	Ubiquitin specific protease 38	0.15543	0.05688	0.0593	-3.81055
NM_001511	Hs.789	Chemokine (C-X-C motif) ligand 1 (melanoma growth stimulating activity, alpha)	0.4247	0.07794	0.0367	-3.78423
AK021887	Hs.525781	Sprouty-related, EVH1 domain containing 1	0.10737	0.037	0.0166	-3.78423
AI990016	Hs.555994	Peroxisomal lon protease	0.21403	0.04734	0.0069	-3.75809
NM_032101	Hs.368160	Protocadherin gamma subfamily C, 3	0.0774	0.02359	0.0284	-3.75809
AL136929	Hs.462742	Ras homolog gene family, member T1	0.11741	0.08701	0.5076	-3.75809
BC030092	Hs.291899	CDNA clone IMAGE:4794631, partial cds	0.30385	0.07426	0.0069	-3.73213
NM_014963	Hs.408708	KIAA0963	0.34172	0.11614	0.0166	-3.73213
NM_000246	Hs.126714	MHC class II transactivator	0.4569	0.23497	0.0926	-3.73213
AK000490	Hs.445098	DEP domain containing 1	0.2413	0.06831	0.0051	-3.70635
BC014364	Hs.24889	Formin 2	0.14406	0.04811	0.0218	-3.70635
NM_017409	Hs.44276	Homeo box C10	0.21826	0.07749	0.0218	-3.70635
AL117601	Hs.554939	Hypothetical protein FLJ35848	0.06879	0.32702	0.3329	-3.70635
NM_080743	Hs.254414	Serine-arginine repressor protein (35 kDa)	0.33766	0.11489	0.0166	-3.70635
AK024527	Hs.539236	CDNA: FLJ20874 fis, clone ADKA02818	0.19474	0.06849	0.0093	-3.68075
BC030588	Hs.549032	Eyes absent homolog 4 (Drosophila)	0.20322	0.07296	0.0745	-3.68075
AU147091	Hs.493518	Hypothetical gene LOC149297	0.27518	0.08722	0.0125	-3.68075
AL359595	Hs.449296	KIAA0947 protein	0.08907	0.02153	0.0125	-3.68075
AI457436	Hs.471119	Bone morphogenetic protein receptor, type II (serine/threonine kinase)	0.1699	0.12469	0.0284	-3.65533
AB032996	Hs.489988	Family with sequence similarity 40, member B	0.15928	0.05185	0.0284	-3.65533
AA180985	Hs.285574	Zinc finger protein 229	0.17897	0.05087	0.0125	-3.63008
BC023657	Hs.516978	Hypothetical protein LOC284804	0.12387	0.03687	0.0745	-3.605
AI758950	Hs.354013	Solute carrier family 26, member 7	0.17526	0.0909	0.0745	-3.605
BF574523	Hs.134602	Titin	0.28905	0.11497	0.0469	-3.605
NM_000550	Hs.270279	Tyrosinase-related protein 1	0.11912	0.05434	0.0593	-3.605
AW303888	Hs.319071	CDNA FLJ32691 fis, clone TESTI2000221	0.13345	0.0783	0.2026	-3.5801
NM_000104	Hs.154654	Cytochrome P450, family 1, subfamily B, polypeptide 1	0.12454	0.04049	0.0218	-3.5801
BC039079	Hs.175437	Erythrocyte membrane protein band 4.1 (elliptocytosis 1, RH-linked)	0.13715	0.02872	0.0125	-3.5801
L24553	Hs.462525	Nitric oxide synthase 2A (inducible, hepatocytes)	0.23003	0.06827	0.0125	-3.5801
AI139639	Hs.513261	Chromosome 16 open reading frame 34	0.20017	0.06434	0.0166	-3.55537
NM_014354	Hs.225962	Chromosome 6 open reading frame 54	0.13177	0.04261	0.0093	-3.55537
R40111	Hs.420757	G patch domain containing 2	0.18268	0.05733	0.0218	-3.55537
BC033319	Hs.399757	Homo sapiens, clone IMAGE:4826630, mRNA	0.219	0.06131	0.0166	-3.55537
AI628734	Hs.368587	Prolactin receptor	0.1074	0.0733	0.1688	-3.55537
AV730473	Hs.530090	Transcribed locus, strongly similar to NP_005605.1 Ras homolog enriched in brain; Ras-homolog enriched in brain; GTP-binding protein Rheb; Ras homolog enriched in brain 2 [Homo sapiens]	0.11623	0.04185	0.0125	-3.55537
AV739195	Hs.463074	ATPase, H+ transporting, lysosomal V0 subunit a isoform 1	0.25952	0.08346	0.0469	-3.53081
NM_018190	Hs.58974	Bardet-Biedl syndrome 7	0.12511	0.04802	0.0218	-3.53081
BE326569	Hs.399763	CDNA clone IMAGE:5263531, partial cds	0.20924	0.0786	0.0469	-3.53081
AA400740	Hs.511847	Hypothetical gene DKFZp434A2223	0.34686	0.10783	0.0218	-3.53081
NM_005584	Hs.532575	Mab-21-like 1 (C. elegans)	0.1311	0.03277	0.0093	-3.53081
AK026036	Hs.432548	Chromosome 10 open reading frame 18	0.3976	0.19091	0.0284	-3.50642
BF111850	Hs.301760	Frequenin homolog (Drosophila)	0.26665	0.09271	0.0218	-3.50642
NM_002108	Hs.190783	Histidine ammonia-lyase	0.17682	0.07028	0.0469	-3.50642
NM_002214	Hs.547130	Integrin, beta 8	0.10539	0.03294	0.0469	-3.50642
NM_002343	Hs.529517	Lactotransferrin	3.72173	0.46796	0.0367	-3.50642
AF121951	Hs.553511	RCE1 homolog, prenyl protein protease (S. cerevisiae)	0.29686	0.14723	0.0051	-3.50642
NM_003469	Hs.516726	Secretogranin II (chromogranin C)	0.16231	0.05217	0.0051	-3.50642
NM_000465	Hs.54089	BRCA1 associated RING domain 1	0.34335	0.14443	0.0166	-3.4822
BE674844	Hs.189119	CXXC finger 5	0.22296	0.08445	0.0367	-3.4822
AU145354	Hs.546712	LOC442436	0.14814	0.03993	0.1141	-3.4822
AW969675	Hs.144744	Triadin	0.08254	0.03681	0.0926	-3.4822
NM_006789	Hs.555915	Apolipoprotein B mRNA editing enzyme, catalytic polypeptide-like 2	0.31084	0.12522	0.0218	-3.45815
AL042120	Hs.149566	Formin-like 2	0.17597	0.19143	0.7213	-3.45815
NM_003552	Hs.553508	Olfactory receptor, family 1, subfamily D, member 5	0.20763	0.08373	0.0051	-3.45815
AA975530	Hs.335205	Slingshot homolog 2 (Drosophila)	0.21407	0.06576	0.0284	-3.45815
AL137458	Hs.126511	Hypothetical LOC389087	0.08746	0.13685	0.2411	-3.43426
AK025574	Hs.86337	Polymerase (RNA) I polypeptide B, 128kDa	0.26295	0.06076	0.0469	-3.43426
AF085843	Hs.499705	Family with sequence similarity 13, member C1	0.20573	0.08359	0.0593	-3.41054
BE218239	Hs.202656	Nuclear localized factor 1	0.27721	0.09183	0.0284	-3.41054
AI769310	Hs.106513	Tolloid-like 1	0.1473	0.0469	0.1688	-3.41054
AW945589	Hs.516646	CAMP responsive element binding protein 1	0.15176	0.04208	0.0469	-3.38698
AI697836	Hs.525171	CDNA FLJ33739 fis, clone BRAWH2018601	0.16306	0.19336	0.0218	-3.38698
AW204564	Hs.535319	HCF-binding transcription factor Zhangfei	0.21252	0.08411	0.0069	-3.38698
BF509242	Hs.468505	Neurexin 1	0.17706	0.05839	0.0125	-3.38698
BE966146	Hs.504550	RAD51 associated protein 1	0.15522	0.06154	0.0367	-3.38698
AI379467	Hs.125038	Similar to CG6405 gene product	0.22377	0.26336	0.1688	-3.38698
BC040644	Hs.434680	CDNA clone IMAGE:4792825, partial cds	0.23796	0.06736	0.0284	-3.36359
AI267546	Hs.498015	Clone 23695 mRNA sequence	0.21673	0.08167	0.1141	-3.36359
BE645776	Hs.69504	Hypothetical LOC133993	0.23075	0.10421	0.0166	-3.36359
AB009597	Hs.524251	Killer cell lectin-like receptor subfamily D, member 1	0.32813	0.10341	0.0051	-3.36359
AA604621	Hs.460184	MCM4 minichromosome maintenance deficient 4 (S. cerevisiae)	0.45656	0.15449	0.0166	-3.36359
AA789293	Hs.369039	PHD finger protein 11	0.10388	0.03765	0.0367	-3.36359
BE501903	Hs.546609	Tight junction protein 2 (zona occludens 2)	0.25077	0.08044	0.0069	-3.36359
NM_003318	Hs.169840	TTK protein kinase	0.30069	0.08241	0.0367	-3.36359
NM_080387	Hs.351811	C-type lectin domain family 4, member D	0.11714	0.04103	0.0593	-3.34035
AU144855	Hs.154654	Cytochrome P450, family 1, subfamily B, polypeptide 1	0.21714	0.05636	0.0125	-3.34035
AI190879	Hs.168278	Hypothetical protein LOC285692	0.28733	0.14705	0.0926	-3.34035
BF111618	Hs.256639	Peptidyl prolyl isomerase H (cyclophilin H)	0.25238	0.09362	0.0051	-3.34035
AI435073	Hs.553786	Programmed cell death 6	0.67938	0.79175	0.0125	-3.34035
AW590666	Hs.302714	Transmembrane protein 26	0.13383	0.06125	0.1141	-3.34035
BC041127	Hs.150693	Activated leukocyte cell adhesion molecule	0.12969	0.04072	0.0469	-3.31728
NM_004942	Hs.105924	Defensin, beta 4	0.24088	0.24955	0.0166	-3.31728
NM_002649	Hs.32942	Phosphoinositide-3-kinase, catalytic, gamma polypeptide	0.22832	0.10009	0.0008	-3.31728
AI476456	Hs.513498	TBC1 domain family, member 10B	0.14148	1e-05	0.0926	-3.31728
BC004992	Hs.148322	Zinc finger protein 577	0.10958	0.03725	0.0166	-3.31728
AF147347	Hs.129452	Dachshund homolog 1 (Drosophila)	0.20744	0.05731	0.0166	-3.29436
AB017551	Hs.81073	Fetuin B	0.28122	0.08956	0.0218	-3.29436
BC038553	Hs.531872	Homo sapiens, clone IMAGE:5275957, mRNA	0.49417	0.18848	0.0166	-3.29436
BC030136	Hs.132593	PR domain containing 5	0.23919	0.08024	0.0469	-3.29436
AA682875	Hs.271903	Amyotrophic lateral sclerosis 2 (juvenile) chromosome region, candidate 19	0.21349	0.0595	0.0125	-3.27161
AI829081	Hs.433499	CGI-14 protein	0.28206	0.07082	0.0284	-3.27161
X99658	Hs.514071	Leucine rich repeat containing 37B	0.21585	0.09996	0.0333	-3.27161
NM_004834	Hs.431550	Mitogen-activated protein kinase kinase kinase kinase 4	0.28702	0.08058	0.0469	-3.27161
AL037998	Hs.452398	MRNA; cDNA DKFZp564E143 (from clone DKFZp564E143)	0.13015	0.11538	0.7089	-3.27161
BF196252	Hs.471162	Ras association (RalGDS/AF-6) and pleckstrin homology domains 1	0.113	0.0467	0.0367	-3.27161
BF002074	Hs.484295	Transcribed locus	0.33229	0.15874	0.0218	-3.27161
BF674749	Hs.490439	Transcribed locus, weakly similar to NP_872301.1 hypothetical protein FLJ25224 [Homo sapiens]	0.15411	0.07359	0.0218	-3.27161
AF000995	Hs.115277	Ubiquitously transcribed tetratricopeptide repeat gene, Y-linked	0.18111	0.07254	0.0469	-3.27161
NM_006649	Hs.458598	UTP14, U3 small nucleolar ribonucleoprotein, homolog A (yeast)	0.16438	0.08609	0.1688	-3.27161
BC029476	Hs.441926	Chromosome 13 open reading frame 24	0.13075	0.04944	0.0469	-3.24901
AL834187	Hs.415950	Fc receptor-like 5	0.30805	0.1277	0.1141	-3.24901
AL050040	Hs.499552	Protein tyrosine phosphatase, non-receptor type 20	0.3054	0.44538	0.2411	-3.24901
BG623786	Hs.435561	Ataxia telangiectasia mutated (includes complementation groups A, C and D)	0.10745	0.02547	0.0218	-3.22657
AI028227	Hs.209206	Hypothetical protein MGC33407	0.14404	0.05046	0.0367	-3.22657
NM_015714	Hs.432132	Putative lymphocyte G0/G1 switch gene	0.30159	0.09782	0.0593	-3.22657
AW467357	Hs.371720	Spleen tyrosine kinase	0.19198	0.05148	0.0069	-3.22657
BE645279	Hs.29792	Transcribed locus, moderately similar to NP_055301.1 neuronal thread protein AD7c-NTP [Homo sapiens]	0.17155	0.0608	0.0032	-3.22657
BC035123	Hs.125571	Transmembrane protease, serine 12	0.14214	0.02929	0.0469	-3.22657
AK022438	Hs.124652	CDNA FLJ12376 fis, clone MAMMA1002494	0.1963	0.07747	0.0069	-3.20428
AA947051	Hs.371597	Dynein 2 light intermediate chain	0.10254	0.06965	0.2845	-3.20428
BC006134	Hs.303653	Hypothetical protein MGC13053	0.20971	0.06781	0.0284	-3.20428
AI027957	Hs.552630	Rai-like protein	0.19133	0.08304	0.1394	-3.20428
BF439137	Hs.440932	Septin 9	0.17479	0.06611	0.0218	-3.20428
AA831373	Hs.278733	Son of sevenless homolog 1 (Drosophila)	0.13909	0.03611	0.0218	-3.20428
AU158573	Hs.19385	Abhydrolase domain containing 5	0.22665	0.09108	0.0125	-3.18215
M57731	Hs.75765	Chemokine (C-X-C motif) ligand 2	0.20201	0.0579	0.0036	-3.18215
BE645967	Hs.199877	Copine IV	0.166	0.06354	0.0367	-3.18215
AI799915	Hs.275757	Discoidin domain receptor family, member 2	0.2163	0.09356	0.0469	-3.18215
NM_015062	Hs.533551	Peroxisome proliferative activated receptor, gamma, coactivator-related 1	0.23547	0.07734	0.0218	-3.18215
BC021582	Hs.486109	Sex comb on midleg-like 4 (Drosophila)	0.175	0.05382	0.0218	-3.18215
NM_003147	Hs.546302	Synovial sarcoma, X breakpoint 2	0.09946	0.02652	0.0926	-3.18215
BC035743	Hs.147064	Thioredoxin domain containing 8	0.22746	0.11926	0.0367	-3.18215
BC040219	Hs.316856	Homo sapiens, clone IMAGE:4818734, mRNA	0.10355	0.04374	0.0745	-3.16017
BC040891	Hs.434633	Hypothetical protein LOC340074	0.16246	0.05696	0.0069	-3.16017
AW970985	Hs.506216	Protein tyrosine phosphatase, receptor type, f polypeptide (PTPRF), interacting protein (liprin), alpha 2	0.14251	0.05253	0.1394	-3.16017
NM_004721	Hs.432898	Ribosomal protein L4	0.2298	0.13069	0.1141	-3.16017
AI276593	Hs.555893	Son of sevenless homolog 2 (Drosophila)	0.11742	0.0476	0.0367	-3.16017
AI800221	Hs.12799	Transcribed locus	0.26632	0.16191	0.0367	-3.16017
AW117452	Hs.555130	Transcribed locus	0.20673	0.0682	0.0367	-3.16017
AW590090	Hs.253244	Transcribed locus	0.19297	0.08027	0.0745	-3.16017
T40942	Hs.209153	Angiopoietin-like 3	0.11983	0.05171	0.0051	-3.13834
NM_005201	Hs.113222	Chemokine (C-C motif) receptor 8	0.24685	0.0959	0.0051	-3.13834
R99939	Hs.164298	LOC439987	0.12642	0.0296	0.0926	-3.13834
BE467534	Hs.351851	Nanos homolog 1 (Drosophila)	0.18878	0.06755	0.0284	-3.13834
X64981	Hs.512487	Olfactory receptor, family 10, subfamily D, member 1 pseudogene	0.27796	0.15193	0.0926	-3.13834
NM_000324	Hs.120950	Rhesus blood group-associated glycoprotein	0.08889	0.02518	0.0745	-3.13834
AI651603	Hs.440414	Spastic paraplegia 20, spartin (Troyer syndrome)	0.22406	0.18243	0.2845	-3.13834
BG426689	Hs.159799	Thyroid hormone receptor associated protein 2	0.12865	0.05954	0.0367	-3.13834
AI432389	Hs.538552	Transcribed locus	0.33837	0.33972	0.0593	-3.13834
AI699506	Hs.442291	Hypothetical gene supported by BC043530	0.23808	0.18296	0.0051	-3.11666
NM_018410	Hs.532968	Hypothetical protein DKFZp762E1312	1.20548	0.50697	0.0469	-3.11666
R92925	Hs.122514	Mitochondrial solute carrier protein	0.11882	0.05504	0.1141	-3.11666
J03580	Hs.89626	Parathyroid hormone-like hormone	0.14383	0.09401	0.1394	-3.11666
BC039498	Hs.79136	Solute carrier family 39 (zinc transporter), member 6	0.0651	0.05463	0.5076	-3.11666
U63332	Hs.532632	Ataxin 3	0.16568	0.05611	0.1141	-3.09513
AI796010	Hs.531879	CDNA FLJ39641 fis, clone SMINT2003423	0.17139	0.09613	0.1688	-3.09513
AI743092	Hs.61205	Full-length cDNA clone CS0DC021YJ09 of Neuroblastoma Cot 25-normalized of Homo sapiens (human)	0.2448	0.0961	0.0284	-3.09513
AF085989	Hs.520319	Solute carrier family 22 (organic cation transporter), member 16	0.25235	0.12558	0.0926	-3.09513
AI827563	Hs.443465	Transcription elongation regulator 1	0.4713	0.18123	0.0051	-3.09513
NM_080618	Hs.131543	CCCTC-binding factor (zinc finger protein)-like	0.16821	0.08949	0.1394	-3.07375
AK092750	Hs.502867	EH domain binding protein 1-like 1	0.24075	0.11049	0.1688	-3.07375
NM_018687	Hs.534467	Hepatocellular carcinoma-associated gene TD26	0.37939	0.13743	0.0166	-3.07375
NM_024107	Hs.181391	Hypothetical protein MGC3123	0.55372	0.32593	0.0469	-3.07375
M27487	Hs.347270	Major histocompatibility complex, class II, DP alpha 1	0.29373	0.12565	0.0093	-3.07375
AI806169	Hs.200938	Transcribed locus	0.12838	0.0762	0.0926	-3.07375
AA993833	Hs.318639	CDNA clone IMAGE:5206119, partial cds	0.21201	0.06375	0.1141	-3.05252
BF592882	Hs.239181	Chromosome 6 open reading frame 194	0.18181	0.06315	0.0593	-3.05252
BI464586	Hs.439634	Homo sapiens, clone IMAGE:5271982, mRNA	0.11354	0.03573	0.0284	-3.05252
AI346341	Hs.494312	Neurotrophic tyrosine kinase, receptor, type 2	0.11102	0.06358	0.0593	-3.05252
AJ245600	Hs.280990	Novel 58.3 KDA protein	0.07657	0.02793	0.0367	-3.05252
AW614597	Hs.27182	Phospholipase A2-activating protein	0.13716	0.0419	0.0367	-3.05252
NM_000306	Hs.89394	POU domain, class 1, transcription factor 1 (Pit1, growth hormone factor 1)	0.12808	0.04392	0.0367	-3.05252
AF336127	Hs.105607	Solute carrier family 4, sodium bicarbonate transporter-like, member 11	0.06201	0.40412	0.0051	-3.05252
AL049979	Hs.370267	Tankyrase, TRF1-interacting ankyrin-related ADP-ribose polymerase	0.10869	0.05583	0.5751	-3.05252
NM_016943	Hs.512595	Taste receptor, type 2, member 3	0.23408	0.07558	0.0125	-3.05252
NM_025009	Hs.518767	Centrosomal protein 4	0.11315	0.05912	0.2845	-3.03143
AK096791	Hs.517948	DEAH (Asp-Glu-Ala-His) box polypeptide 30	0.25092	0.1135	0.0218	-3.03143
AL133561	Hs.448583	DKFZP434B061 protein	0.21544	0.21875	0.9594	-3.03143
AF147445	Hs.555285	Full length insert cDNA clone ZM10C10	0.29626	0.1545	0.0218	-3.03143
BC015449	Hs.49127	Homo sapiens, clone IMAGE:4427279, mRNA	0.2143	0.09171	0.0218	-3.03143
BC038532	Hs.274882	Homo sapiens, clone IMAGE:5165147, mRNA	0.13379	0.04859	0.0367	-3.03143
BC042493	Hs.434235	Hypothetical gene supported by BC042493	0.14019	0.04037	0.0926	-3.03143
AI655730	Hs.121392	Hypothetical LOC338825	0.20836	0.18132	0.0593	-3.03143
X13230	Hs.387262	MCF.2 cell line derived transforming sequence	0.20571	0.09722	0.0218	-3.03143
AY083533	Hs.459526	Mucolipin 2	0.29212	0.10641	0.0166	-3.03143
AK025596	Hs.435947	RNA binding motif protein 15	0.10894	0.03438	0.0367	-3.03143
AL122074	Hs.112631	Slit homolog 3 (Drosophila)	0.11939	0.19084	0.1141	-3.03143
AV749665	Hs.362492	Transcribed locus	0.21909	0.07477	0.0166	-3.03143
BC035636	Hs.310421	Amyloid beta (A4) precursor protein-binding, family B, member 1 interacting protein	0.14869	0.05368	0.0367	-3.01049
AV692159	Hs.131686	ATP-binding cassette, sub-family A (ABC1), member 9	0.16919	0.06817	0.1394	-3.01049
BF749719	Hs.513392	Chromosome 14 open reading frame 46	0.2856	0.09373	0.0166	-3.01049
AA088430	Hs.467696	Hippocalcin-like 1	0.30816	0.15141	0.1141	-3.01049
AL135700	Hs.254699	Hypothetical protein FLJ34658	0.30256	0.22635	0.1005	-3.01049
NM_000586	Hs.89679	Interleukin 2	0.13307	0.05898	0.1141	-3.01049
BC005342	Hs.282204	Nucleosomal binding protein 1	0.15049	0.06427	0.0593	-3.01049
AF070543	Hs.155915	Odz, odd Oz/ten-m homolog 2 (Drosophila)	0.0951	0.04637	0.2845	-3.01049
BC008410	Hs.111749	PMS1 postmeiotic segregation increased 1 (S. cerevisiae)	0.24471	0.08795	0.0218	-3.01049
NM_017827	Hs.14220	Seryl-tRNA synthetase 2	0.98226	0.49778	0.0166	-3.01049
AF215824	Hs.166003	A disintegrin and metalloproteinase domain 7	0.14151	0.06873	0.0093	-2.9897
BG435715	Hs.528915	CDNA FLJ11325 fis, clone PLACE1010383	0.23822	0.11408	0.0017	-2.9897
AI567462	Hs.148767	RCD1 required for cell differentiation1 homolog (S. pombe)	0.09791	0.08603	0.0069	-2.9897
NM_018666	Hs.195292	Sarcoma antigen 1	0.23012	0.08771	0.0166	-2.9897
AF086000	Hs.390623	X-prolyl aminopeptidase (aminopeptidase P) 1, soluble	0.19122	0.08328	0.0284	-2.9897
AA648913	Hs.514527	Baculoviral IAP repeat-containing 5 (survivin)	0.38386	0.16209	0.0069	-2.96905
AI076370	Hs.124366	Bobby sox homolog (Drosophila)	0.21902	0.07515	0.0125	-2.96905
NM_145695	Hs.487619	Diacylglycerol kinase, beta 90kDa	0.20674	0.1251	0.1141	-2.96905
NM_007034	Hs.380282	DnaJ (Hsp40) homolog, subfamily B, member 4	0.1996	0.07496	0.1394	-2.96905
BF115776	Hs.5737	Family with sequence similarity 20, member B	0.21346	0.06257	0.0593	-2.96905
NM_002029	Hs.753	Formyl peptide receptor 1	0.64591	0.20629	0.0051	-2.96905
BE856598	Hs.122006	Galactokinase 2	0.22047	0.11338	0.0367	-2.96905
NM_005321	Hs.248133	Histone 1, H1e	0.14687	0.04599	0.1394	-2.96905
BC024025	Hs.540552	Homo sapiens, clone IMAGE:4700331, mRNA	0.1403	0.06101	0.0469	-2.96905
BC039327	Hs.407613	Homo sapiens, clone IMAGE:5267277, mRNA	0.17542	0.06813	0.0926	-2.96905
AF456465	Hs.120275	Hypothetical protein	0.16215	0.05228	0.0051	-2.96905
BC011266	Hs.478160	Hypothetical protein BC011266	0.10198	0.0402	0.0284	-2.96905
AI150140	Hs.547935	Hypothetical protein LOC283112	0.15133	0.02121	0.0367	-2.96905
BF668314	Hs.221497	PRO0149 protein	0.08035	0.01656	0.0284	-2.96905
BG622833	Hs.494648	Testis expressed sequence 10	0.19278	0.074	0.01	-2.96905
NM_002589	Hs.479439	BH-protocadherin (brain-heart)	0.18099	0.05907	0.0284	-2.94854
BC036119	Hs.199876	Chromosome 6 open reading frame 65	0.0934	0.04402	0.0367	-2.94854
NM_001941	Hs.41690	Desmocollin 3	0.22376	0.0958	0.0125	-2.94854
AI699994	Hs.2868	Peripheral myelin protein 2	0.22977	0.27204	0.0367	-2.94854
BQ014020	Hs.530272	Similar to RIKEN cDNA 5730528L13 gene	0.2132	0.08912	0.0284	-2.94854
AK023208	Hs.62180	Anillin, actin binding protein (scraps homolog, Drosophila)	0.50428	0.19881	0.0069	-2.92817
AK024561	Hs.545857	CDNA: FLJ20908 fis, clone ADSE00417	0.20679	0.0564	0.0284	-2.92817
AL524035	Hs.334562	Cell division cycle 2, G1 to S and G2 to M	1.74957	0.62812	0.0926	-2.92817
AK092565	Hs.292059	EPH receptor A6	0.19431	0.11146	0.0367	-2.92817
T55506	Hs.530438	FLJ46154 protein	0.1028	0.02574	0.0166	-2.92817
BF750565	Hs.270851	HIV-1 induced protein HIN-1	0.17227	0.05426	0.0593	-2.92817
BC043524	Hs.434319	Hypothetical protein LOC339568	0.20222	0.08613	0.0069	-2.92817
AI467798	Hs.503598	Jumonji domain containing 2D	0.14446	0.08256	0.0367	-2.92817
NM_024680	Hs.523526	Likely ortholog of mouse E2F transcription factor 8	0.56769	0.22821	0.0125	-2.92817
NM_002915	Hs.115474	Replication factor C (activator 1) 3, 38kDa	0.16968	0.10807	0.3329	-2.92817
BC022483	Hs.483238	Rho GTPase activating protein 29	0.05538	0.01834	0.0745	-2.92817
NM_000185	Hs.474270	Serine (or cysteine) proteinase inhibitor, clade D (heparin cofactor), member 1	0.26325	0.11739	0.0125	-2.92817
AI741900	Hs.536389	Transcribed locus, moderately similar to XP_530251.1 PREDICTED: hypothetical protein XP_530251 [Pan troglodytes]	0.10301	0.03308	0.0745	-2.92817
NM_015984	Hs.145469	Ubiquitin carboxyl-terminal hydrolase L5	0.17389	0.07548	0.0218	-2.92817
BC011404	Hs.442705	Zinc finger protein 31 (KOX 29)	0.22285	0.09693	0.0218	-2.92817
NM_152701	Hs.226568	ATP-binding cassette, sub-family A (ABC1), member 13	0.12346	0.01659	0.0745	-2.90795
AK001928	Hs.124246	Chromosome 10 open reading frame 119	0.07897	0.03141	0.0745	-2.90795
BC029359	Hs.468349	Chromosome 2 open reading frame 34	0.08753	0.05331	0.1394	-2.90795
AF130064	Hs.551085	Clone FLB7925 PRO2122 mRNA, complete cds	0.20967	0.0768	0.0125	-2.90795
NM_021795	Hs.497520	ELK4, ETS-domain protein (SRF accessory protein 1)	0.16518	0.07079	0.0469	-2.90795
BC012462	Hs.348920	FSH primary response (LRPR1 homolog, rat) 1	0.16881	0.05898	0.0593	-2.90795
BF058422	Hs.23871	Full-length cDNA clone CS0DI014YH21 of Placenta Cot 25-normalized of Homo sapiens (human)	0.26538	0.0949	0.1141	-2.90795
NM_138336	Hs.293884	Helicase/primase complex protein	0.1366	0.04528	0.0051	-2.90795
T81639	Hs.471917	Proteasome (prosome, macropain) inhibitor subunit 1 (PI31)	0.5231	0.26344	0.0284	-2.90795
AI669229	Hs.131269	Retinoic acid receptor responder (tazarotene induced) 1	0.12643	0.07569	0.0284	-2.90795
AF221846	Hs.268887	Serine/threonine kinase 17a (apoptosis-inducing)	0.18943	0.11646	0.1394	-2.90795
AF339799	Hs.508514	Serine/threonine kinase 24 (STE20 homolog, yeast)	0.11951	0.04255	0.1394	-2.90795
AU154994	Hs.250281	Solute carrier family 13 (sodium-dependent dicarboxylate transporter), member 3	0.12705	0.07331	0.1394	-2.90795
AV684859	Hs.517075	Zinc finger, SWIM domain containing 1	0.23785	0.12139	0.0926	-2.90795
NM_001133	Hs.168718	Afamin	0.15006	0.06484	0.0469	-2.88786
M28590	Hs.436568	CD74 antigen (invariant polypeptide of major histocompatibility complex, class II antigen-associated)	0.48552	0.18044	0.0284	-2.88786
AK025117	Hs.410231	Chromosome 14 open reading frame 118	0.22799	0.07955	0.0593	-2.88786
BC039668	Hs.549602	Homo sapiens, clone IMAGE:5165100, mRNA	0.28389	0.12348	0.0218	-2.88786
AL832750	Hs.334306	Hypothetical protein FLJ25179	0.18055	0.06719	0.1394	-2.88786
NM_020398	Hs.121084	Serine protease inhibitor-like, with Kunitz and WAP domains 1 (eppin)	0.46348	0.19913	0.0926	-2.88786
NM_000055	Hs.420483	Butyrylcholinesterase	0.11413	0.03642	0.1688	-2.86791
NM_004591	Hs.75498	Chemokine (C-C motif) ligand 20	0.27369	0.13851	0.2411	-2.86791
BE899474	Hs.15400	Dexamethasone-induced transcript	0.40243	0.16186	0.0069	-2.86791
AK024454	Hs.531619	Egf-like module containing, mucin-like, hormone receptor-like 2	0.15275	0.07662	0.0926	-2.86791
BC006141	Hs.213394	Erythrocyte membrane protein band 4.1-like 3	0.1451	0.08366	0.0218	-2.86791
M60485	Hs.264887	Fibroblast growth factor receptor 1 (fms-related tyrosine kinase 2, Pfeiffer syndrome)	0.23316	0.11358	0.0125	-2.86791
BF062377	Hs.129598	Fibrous sheath interacting protein 1	0.12085	0.05875	0.0218	-2.86791
BE672408	Hs.505946	Glutamate receptor interacting protein 1	0.10959	0.05917	0.0926	-2.86791
BC014134	Hs.445061	Homo sapiens, clone IMAGE:5265084, mRNA	0.42014	0.1925	0.0367	-2.86791
BC028598	Hs.556336	Homo sapiens, clone IMAGE:5269182, mRNA	0.15897	0.08067	0.1141	-2.86791
AA748418	Hs.33368	Multiple C2-domains with two transmembrane regions 2	0.25891	0.11285	0.0166	-2.86791
AW238654	Hs.416073	S100 calcium binding protein A8 (calgranulin A)	0.13718	0.07689	0.1141	-2.86791
AV757441	Hs.429839	Similar to transcription factor BTF3	0.11824	0.02657	0.0926	-2.86791
AI041854	Hs.17255	Splicing factor, arginine/serine-rich 15	0.1514	0.09445	0.1141	-2.86791
AI130690	Hs.527860	Transcribed locus	0.13888	0.10096	0.2845	-2.86791
BC032307	Hs.317590	Hypothetical protein FLJ14640	0.06414	0.05667	0.2026	-2.8481
AI733797	Hs.533986	Hypothetical protein MGC14276	0.4578	0.17433	0.0284	-2.8481
NM_020958	Hs.259599	KIAA1622	0.11599	0.02682	0.0367	-2.8481
AI742868	Hs.24422	Regulatory factor X-associated protein	0.13902	0.07737	0.0926	-2.8481
AF132198	Hs.270107	SDA1 domain containing 1	0.15341	0.05941	0.0469	-2.8481
AK024292	Hs.105153	Shugoshin-like 1 (S. pombe)	0.16086	0.0861	0.1394	-2.8481
BF433962	Hs.125038	Similar to CG6405 gene product	0.13603	0.06213	0.1688	-2.8481
U21938	Hs.69049	Tocopherol (alpha) transfer protein (ataxia (Friedreich-like) with vitamin E deficiency)	0.20071	0.05687	0.0469	-2.8481
AI884858	Hs.426324	Tumor suppressor candidate 3	0.30562	0.11572	0.0069	-2.8481
NM_003175	Hs.458346	Chemokine (C motif) ligand 2	0.24116	0.1024	0.1141	-2.82843
BC036577	Hs.379858	Dimethylarginine dimethylaminohydrolase 1	0.39068	0.16201	0.0069	-2.82843
NM_004430	Hs.534313	Early growth response 3	0.21283	0.1205	0.0926	-2.82843
NM_018485	Hs.534412	G protein-coupled receptor 77	0.1708	0.06554	0.0125	-2.82843
BC019022	Hs.434498	Hypothetical gene supported by BC007071	0.2013	0.09203	0.0593	-2.82843
AW341129	Hs.549121	Hypothetical protein LOC285331	0.18506	0.09397	0.0218	-2.82843
AI799784	Hs.146246	Hypothetical protein MGC45780	0.17223	0.05489	0.0593	-2.82843
AW028799	Hs.369356	Myeloid/lymphoid or mixed-lineage leukemia 5 (trithorax homolog, Drosophila)	0.16656	0.08508	0.0745	-2.82843
BC007114	Hs.372360	Parathyroid hormone-responsive B1 gene	0.21292	0.13507	0.0284	-2.82843
NM_004157	Hs.517841	Protein kinase, cAMP-dependent, regulatory, type II, alpha	0.28022	0.13002	0.0593	-2.82843
BE873420	Hs.554822	UDP glycosyltransferase 1 family, polypeptide A9	0.1967	0.06193	0.0111	-2.82843
NM_003672	Hs.533582	CDC14 cell division cycle 14 homolog A (S. cerevisiae)	0.10995	0.05309	0.0745	-2.80889
AK026267	Hs.544309	CDNA: FLJ22614 fis, clone HSI05089	0.43689	0.20003	0	-2.80889
AI939313	Hs.118140	Dedicator of cytokinesis 4	0.15719	0.0639	0.0745	-2.80889
J04162	Hs.372679	Fc fragment of IgG, low affinity IIIb, receptor (CD16b)	0.21131	0.06629	0.1688	-2.80889
BF222483	Hs.53985	Glycoprotein 2 (zymogen granule membrane)	4.33774	0.58956	0.0218	-2.80889
NM_014702	Hs.319247	KIAA0408	0.10535	0.03113	0.0926	-2.80889
NM_005733	Hs.73625	Kinesin family member 20A	0.42493	0.12131	0.0469	-2.80889
AA682371	Hs.432854	Pepsinogen 5, group I (pepsinogen A)	0.24688	0.14762	0.0166	-2.80889
AF257080	Hs.493037	Potassium channel, subfamily K, member 9	0.40411	0.14555	0.0166	-2.80889
BC035815	Hs.470445	Potassium voltage-gated channel, subfamily H (eag-related), member 7	0.14287	0.05955	0.2026	-2.80889
AI478850	Hs.368264	Protein phosphatase 2, regulatory subunit B (B56), gamma isoform	0.09053	0.06915	0.0745	-2.80889
AI078196	Hs.252189	Syndecan 4 (amphiglycan, ryudocan)	0.14523	0.05783	0.0093	-2.80889
AI768860	Hs.206768	Transcribed locus, weakly similar to NP_058649.2 phosphodiesterase 11A; cyclic nucleotide phosphodiesterase 11A1 [Homo sapiens]	0.31972	0.14051	0.0593	-2.80889
AK091704	Hs.517144	Hypothetical protein LOC149773	0.11033	0.05328	0.2845	-2.78949
BE536730	Hs.255430	KIAA2026	0.06617	0.01603	0.1394	-2.78949
BC003408	Hs.169246	Melanoma antigen family A, 12	0.10523	0.0211	0.1688	-2.78949
AA921841	Hs.444986	Methionyl aminopeptidase 2	0.34678	0.14596	0.0125	-2.78949
AF181660	Hs.493919	Myelin protein zero-like 1	0.28342	0.11576	0.0051	-2.78949
AK092432	Hs.379010	Prostate stem cell antigen	0.13567	0.06152	0.0926	-2.78949
NM_002590	Hs.19492	Protocadherin 8	0.10814	0.06217	0.1141	-2.78949
AI377758	Hs.164799	Testes development-related NYD-SP17	0.19411	0.08131	0.0284	-2.78949
AV733292	Hs.388575	Transcribed locus	0.2412	0.11886	0.0745	-2.78949
NM_001561	Hs.193418	Tumor necrosis factor receptor superfamily, member 9	0.33127	0.1308	0.0069	-2.78949
NM_007136	Hs.271079	Zinc finger protein 80 (pT17)	0.11211	0.04965	0.0367	-2.78949
AL117532	Hs.156231	Zinc finger, CCHC domain containing 14	0.22732	0.19637	0.5751	-2.78949
H23230	Hs.481186	Chloride channel 3	0.19054	0.07343	0.0166	-2.77022
AU155118	Hs.435500	Hypothetical protein MGC40214	0.19158	0.10057	0.0926	-2.77022
NM_016067	Hs.546388	Mitochondrial ribosomal protein S18C	0.3229	0.14464	0.0469	-2.77022
AW070323	Hs.88297	Serine/threonine kinase 17b (apoptosis-inducing)	0.10231	0.02709	0.0069	-2.77022
AL512697	Hs.549350	Similar to C10orf94 protein	0.18594	0.08276	0.0469	-2.77022
U44403	Hs.75367	Src-like-adaptor	0.44531	0.24887	0.0593	-2.77022
NM_013381	Hs.199814	Thyrotropin-releasing hormone degrading ectoenzyme	0.12406	0.07105	0.0125	-2.77022
D38553	Hs.308045	Barren homolog (Drosophila)	0.19184	0.05004	0.0745	-2.75108
AL512721	Hs.397705	Calmodulin binding transcription activator 1	0.2298	0.09791	0.0593	-2.75108
AW292996	Hs.444593	CDNA FLJ42688 fis, clone BRAMY3002120	0.19811	0.06138	0.0745	-2.75108
NM_152777	Hs.143845	Chromosome 14 open reading frame 48	0.32365	0.12462	0.0218	-2.75108
AW085570	Hs.190384	COP9 constitutive photomorphogenic homolog subunit 4 (Arabidopsis)	0.10066	0.03878	0.0284	-2.75108
AA758795	Hs.241431	Guanine nucleotide binding protein (G protein), alpha activating activity polypeptide O	0.20908	0.10269	0.0284	-2.75108
AL832227	Hs.379026	MRNA; cDNA DKFZp686P1536 (from clone DKFZp686P1536)	0.09187	0.0437	0.1454	-2.75108
AI830823	Hs.518727	RNA-binding protein	0.16742	0.05726	0.0015	-2.75108
AI826268	Hs.497598	Solute carrier family 25, member 29	0.21595	0.09945	0.0166	-2.75108
AI823665	Hs.443465	Transcription elongation regulator 1	0.16737	0.06359	0.0593	-2.75108
BF510413	Hs.350806	UBX domain containing 2	0.08063	0.04669	0.2026	-2.75108
NM_018014	Hs.370549	B-cell CLL/lymphoma 11A (zinc finger protein)	0.41853	0.17757	0.0284	-2.73208
BC017724	Hs.518760	FIP1 like 1 (S. cerevisiae)	0.16985	0.06683	0.0469	-2.73208
AL698576	Hs.141055	Hypothetical gene supported by BC040718	0.0884	0.04128	0.1141	-2.73208
BC034017	Hs.374448	Hypothetical protein MGC22265	0.25354	0.09241	0.0166	-2.73208
AW235671	Hs.245798	Hypothetical protein MGC23401	0.191	0.0801	0.0069	-2.73208
R37655	Hs.194761	IMAGE cDNA clone 26881	0.43569	0.16237	0.0093	-2.73208
AU145463	Hs.381058	KIAA0146 protein	0.22144	0.07461	0.0069	-2.73208
AI375083	Hs.136893	Leucine rich repeat and fibronectin type III domain containing 5	0.14933	0.04383	0.0284	-2.73208
AA994467	Hs.490981	Methionine sulfoxide reductase A	0.11734	0.03498	0.0745	-2.73208
BC032715	Hs.372360	Parathyroid hormone-responsive B1 gene	0.14364	0.12406	0.1688	-2.73208
AI806107	Hs.233495	Pleckstrin homology domain containing, family A (phosphoinositide binding specific) member 8	0.21005	0.08575	0.0593	-2.73208
AF182069	Hs.528665	Prokineticin 2	0.11618	0.07526	0.0284	-2.73208
AI970367	Hs.498570	Protein kinase C, theta	0.16416	0.07997	0.0093	-2.73208
AI042187	Hs.439031	Transcribed locus, weakly similar to XP_375099.1 PREDICTED: similar to hypothetical protein FLJ25224 [Homo sapiens]	0.20585	0.11875	0.1141	-2.73208
NM_001211	Hs.36708	BUB1 budding uninhibited by benzimidazoles 1 homolog beta (yeast)	0.32273	0.13035	0.0093	-2.71321
H97168	Hs.368878	Chromosome 17 open reading frame 32	0.25346	0.10786	0.0367	-2.71321
AL390170	Hs.8077	Clone 23555 mRNA sequence	0.14234	0.05303	0.1688	-2.71321
S64699	Hs.489786	Cystic fibrosis transmembrane conductance regulator, ATP-binding cassette (sub-family C, member 7)	0.07631	0.02242	0.0367	-2.71321
AF289570	Hs.516769	EF hand domain family, member D1	0.24233	0.05405	0.1394	-2.71321
BF244402	Hs.403933	F-box protein 32	0.19087	0.07669	0.1688	-2.71321
NM_021953	Hs.239	Forkhead box M1	0.61922	0.24265	0.0218	-2.71321
AA811983	Hs.549077	Full-length cDNA clone CS0DF033YJ19 of Fetal brain of Homo sapiens (human)	0.15083	0.0698	0.0218	-2.71321
AI336233	Hs.435510	Hypothetical protein LOC283130	0.27447	0.12599	0.3329	-2.71321
AL359605	Hs.283851	MRNA; cDNA DKFZp547G036 (from clone DKFZp547G036)	0.21531	0.08069	0.0166	-2.71321
AL137575	Hs.274581	MRNA; cDNA DKFZp564C1964 (from clone DKFZp564C1964)	0.2999	0.25176	0.9594	-2.71321
AL833742	Hs.185677	Neural precursor cell expressed, developmentally down-regulated 4-like	0.21148	0.12753	0.0745	-2.71321
AF195420	Hs.130438	Odz, odd Oz/ten-m homolog 3 (Drosophila)	0.16512	0.08666	0.0469	-2.71321
NM_000914	Hs.2353	Opioid receptor, mu 1	0.16573	0.08408	0.2411	-2.71321
AA843719	Hs.207174	Transcribed locus	0.14757	0.05603	0.1141	-2.71321
AL545760	Hs.129683	Ubiquitin-conjugating enzyme E2D 1 (UBC4/5 homolog, yeast)	0.28384	0.16234	0.0284	-2.71321
NM_152565	Hs.436360	ATPase, H+ transporting, lysosomal 38kDa, V0 subunit d isoform 2	0.12934	0.06885	0.0926	-2.69447
AF339767	Hs.16647	Clone IMAGE:116415, mRNA sequence	0.22075	0.11299	0.0125	-2.69447
AI751130	Hs.513260	DDHD domain containing 1	0.31139	0.12681	0.0125	-2.69447
AW075105	Hs.122908	DNA replication factor	1.40182	0.72085	0.0745	-2.69447
T83672	Hs.533683	Fibroblast growth factor receptor 2 (bacteria-expressed kinase, keratinocyte growth factor receptor, craniofacial dysostosis 1, Crouzon syndrome, Pfeiffer syndrome, Jackson-Weiss syndrome)	0.16033	0.08678	0.0745	-2.69447
BC016356	Hs.541692	Homo sapiens, clone IMAGE:4093039, mRNA	0.17339	0.06128	0.0069	-2.69447
AI246730	Hs.459311	Hypothetical protein DKFZp547K1113	0.66774	0.29844	0.0051	-2.69447
BQ636703	Hs.376041	Hypothetical protein LOC283070	0.17171	0.08008	0.2026	-2.69447
CA391618	Hs.238432	Hypothetical protein SP192	0.1679	0.07636	0.1141	-2.69447
AV724192	Hs.21572	KIAA0644 gene product	0.14695	0.06731	0.0093	-2.69447
BC017927	Hs.482910	Leukocyte-derived arginine aminopeptidase	0.09842	0.0345	0.2411	-2.69447
NM_002469	Hs.35937	Myogenic factor 6 (herculin)	0.21895	0.10312	0.0218	-2.69447
NM_002550	Hs.555884	Olfactory receptor, family 3, subfamily A, member 1	0.2786	0.10357	0.0367	-2.69447
Y11162	Hs.534405	RNA, U68 small nucleolar	0.227	0.0746	0.0218	-2.69447
NM_014351	Hs.189810	Sulfotransferase family 4A, member 1	0.23746	0.16763	0.2411	-2.69447
BF433902	Hs.81791	Tumor necrosis factor receptor superfamily, member 11b (osteoprotegerin)	0.10678	0.03985	0.1394	-2.69447
AB011097	Hs.436186	Type 1 tumor necrosis factor receptor shedding aminopeptidase regulator	0.10913	0.07274	0.1394	-2.69447
AA702810	Hs.444304	6-phosphofructo-2-kinase/fructose-2,6-biphosphatase 1	0.22658	0.0785	0.0166	-2.67586
AV717336	Hs.486542	BCL2-associated transcription factor 1	0.15217	0.03575	0.0367	-2.67586
BC036581	Hs.258228	CDNA clone IMAGE:4795984, partial cds	0.21093	0.1182	0.1688	-2.67586
BF194816	Hs.106015	Development and differentiation enhancing factor 1	0.2143	0.09878	0.0218	-2.67586
BC036362	Hs.556070	Hypothetical LOC387905	0.37868	0.14666	0.0367	-2.67586
NM_006389	Hs.277704	Hypoxia up-regulated 1	0.19256	0.12324	0.1394	-2.67586
X68742	Hs.519304	Integrin, alpha 1	0.1198	0.05323	0.0745	-2.67586
NM_002184	Hs.532082	Interleukin 6 signal transducer (gp130, oncostatin M receptor)	0.16262	0.09156	0.1141	-2.67586
NM_021049	Hs.546265	Melanoma antigen family A, 5	0.16971	0.09347	0.0469	-2.67586
AI452798	Hs.462257	Myocardin	0.26023	0.40465	0.0051	-2.67586
NM_016359	Hs.511093	Nucleolar and spindle associated protein 1	1.2838	0.52445	0.0284	-2.67586
N22776	Hs.556072	TIMM9	0.07613	0.03594	0.1141	-2.67586
AW444620	Hs.436307	Transcribed locus	0.13339	0.02387	0.0745	-2.67586
AI807197	Hs.118704	Transcribed locus, moderately similar to XP_209041.2 PREDICTED: similar to KIAA1503 protein [Homo sapiens]	0.15925	0.06825	0.1688	-2.67586
W88801	Hs.508148	Trans-prenyltransferase	0.21443	0.07064	0.1394	-2.67586
X78931	Hs.99971	Zinc finger protein 272	0.2385	0.08517	0.0469	-2.67586
NM_014391	Hs.448589	Ankyrin repeat domain 1 (cardiac muscle)	0.31887	0.09857	0.0593	-2.65737
AW138265	Hs.552568	Calsequestrin 1 (fast-twitch, skeletal muscle)	0.34249	0.13416	0.0093	-2.65737
AU146081	Hs.271643	Chromosome 6 open reading frame 209	0.38837	0.19544	0.0284	-2.65737
AI476268	Hs.130690	Citrate lyase beta like	0.56183	0.46218	0.0593	-2.65737
BC036896	Hs.555868	Ellis van Creveld syndrome	0.28739	0.13229	0.0926	-2.65737
AK024083	Hs.6764	Histone deacetylase 6	0.49359	0.22517	0.0125	-2.65737
AF085918	Hs.20521	HMT1 hnRNP methyltransferase-like 2 (S. cerevisiae)	0.18609	0.12882	0.3329	-2.65737
BQ003366	Hs.531822	Hypothetical protein LOC150759	5.02296	2.22829	0.0593	-2.65737
BF434539	Hs.145597	Hypothetical protein LOC285771	0.34437	0.16963	0.0284	-2.65737
AK024300	Hs.175465	Hypothetical protein LOC90768	0.17601	0.07868	0.0926	-2.65737
NM_016239	Hs.462390	Myosin XVA	0.17737	0.07025	0.0166	-2.65737
BF589359	Hs.492106	Phosphoprotein associated with glycosphingolipid microdomains 1	0.17478	0.08696	0.0125	-2.65737
NM_014037	Hs.130949	Solute carrier family 6, member 16	0.30625	0.14485	0.0218	-2.65737
AV649309	Hs.440934	Arginase, liver	0.16466	0.06935	0.0469	-2.63902
AI245074	Hs.530150	CDNA FLJ34038 fis, clone FCBBF2005645	0.23888	0.12099	0.1394	-2.63902
NM_024094	Hs.315167	Defective in sister chromatid cohesion homolog 1 (S. cerevisiae)	0.37835	0.15592	0.0125	-2.63902
AA649201	Hs.462946	F-box and leucine-rich repeat protein 20	0.20674	0.08775	0.0593	-2.63902
T67024	Hs.403917	FERM, RhoGEF (ARHGEF) and pleckstrin domain protein 1 (chondrocyte-derived)	0.33095	0.15067	0.0022	-2.63902
AA846862	Hs.20160	Full length insert cDNA YU76E12	0.30795	0.14071	0.0069	-2.63902
BC040294	Hs.434615	Homo sapiens, clone IMAGE:4821806, mRNA	0.24152	0.10921	0.0745	-2.63902
BC040642	Hs.513509	Hypothetical protein FLJ32130	0.17117	0.07308	0.0367	-2.63902
BC043561	Hs.428275	Hypothetical protein LOC340017	0.07851	0.06717	0.6465	-2.63902
AI079543	Hs.554990	LOC440283	0.1387	0.06186	0.0469	-2.63902
NM_004668	Hs.122785	Maltase-glucoamylase (alpha-glucosidase)	0.17924	0.07763	0.0367	-2.63902
NM_005496	Hs.58992	SMC4 structural maintenance of chromosomes 4-like 1 (yeast)	0.09445	0.04139	0.0745	-2.63902
AI612775	Hs.145710	Transcribed locus	0.08298	0.08214	0.1141	-2.63902
AW182556	Hs.464896	Zinc finger protein 397	0.19331	0.11633	0.1394	-2.63902
AF393369	Hs.387648	Adaptor-related protein complex 1, sigma 3 subunit	0.12971	0.04984	0.0284	-2.62079
NM_080664	Hs.116014	Chromosome 14 open reading frame 126	0.12499	0.05364	0.0284	-2.62079
NM_024882	Hs.368337	Chromosome 6 open reading frame 155	0.20661	0.08809	0.0125	-2.62079
BE349115	Hs.117169	Collagen, type XXII, alpha 1	0.20103	0.07175	0.0593	-2.62079
AK090616	Hs.391695	Hypothetical gene supported by AK090616	0.33258	0.17464	0.0218	-2.62079
AA292789	Hs.135094	Hypothetical protein LOC146909	0.28821	0.1452	0.0367	-2.62079
NM_024086	Hs.513862	Hypothetical protein MGC3329	0.27179	0.13195	0.0051	-2.62079
NM_001559	Hs.479347	Interleukin 12 receptor, beta 2	0.16291	0.0753	0.1688	-2.62079
BF030508	Hs.406492	KIAA0738 gene product	0.14948	0.03777	0.0745	-2.62079
BC040181	Hs.444414	Lymphoid nuclear protein related to AF4	0.16973	0.0577	0.0218	-2.62079
AI492500	Hs.508993	Ring finger protein 14	0.19454	0.23671	0.0926	-2.62079
BC026225	Hs.535446	Similar to nodulin	0.54065	0.20934	0.0125	-2.62079
AL121421	Hs.408467	Spermatogenesis associated 6	0.26956	0.20926	0.093	-2.62079
BE302089	Hs.143604	Zinc finger and BTB domain containing 33	0.12669	0.07006	0.1394	-2.62079
NM_022120	Hs.472491	3-oxoacid CoA transferase 2	0.26422	0.10771	0.0166	-2.60268
NM_000868	Hs.149037	5-hydroxytryptamine (serotonin) receptor 2C	0.16741	0.06439	0.0926	-2.60268
BF112253	Hs.386283	A disintegrin and metalloproteinase domain 12 (meltrin alpha)	0.12832	0.03958	0.2845	-2.60268
BC002828	Hs.213393	Angiogenic factor with G patch and FHA domains 1	0.28271	0.14138	0.0593	-2.60268
AK023540	Hs.469649	BUB1 budding uninhibited by benzimidazoles 1 homolog (yeast)	0.26156	0.09788	0.1141	-2.60268
AA971429	Hs.390736	CASP8 and FADD-like apoptosis regulator	0.45851	0.22194	0.0166	-2.60268
BF345233	Hs.349891	CDNA FLJ30856 fis, clone FEBRA2003258	0.21424	0.07612	0.0469	-2.60268
BC037954	Hs.98262	Glutamate receptor, ionotropic, kainate 2	0.16902	0.05887	0.0367	-2.60268
AL389981	Hs.149219	Hypothetical protein BC012317	0.32474	0.14727	0.0218	-2.60268
NM_024788	Hs.521012	Hypothetical protein FLJ21062	0.32342	0.13367	0.0593	-2.60268
AK024887	Hs.308122	Inositol 1,3,4-triphosphate 5/6 kinase	0.22498	0.07283	0.0166	-2.60268
AW294022	Hs.308710	KIAA1718 protein	0.15905	0.06149	0.0166	-2.60268
NM_015640	Hs.530412	PAI-1 mRNA-binding protein	0.18925	0.09711	0.0926	-2.60268
NM_006622	Hs.398157	Polo-like kinase 2 (Drosophila)	0.24849	0.11804	0.0593	-2.60268
NM_001085	Hs.534293	Serine (or cysteine) proteinase inhibitor, clade A (alpha-1 antiproteinase, antitrypsin), member 3	0.59351	0.25699	0.0093	-2.60268
AW965339	Hs.44269	Shugoshin-like 2 (S. pombe)	0.12855	0.0689	0.1394	-2.60268
AA479678	Hs.535995	Similar to Serine/threonine-protein kinase PRKX (Protein kinase PKX1)	0.20084	0.15005	0.3329	-2.60268
NM_016569	Hs.129895	T-box 3 (ulnar mammary syndrome)	0.14046	0.04683	0.0745	-2.60268
AW007021	Hs.79353	Transcription factor Dp-1	0.12391	0.04333	0.0745	-2.60268
AI028478	Hs.314338	WD repeat domain 9	0.09466	0.03702	0.1394	-2.60268
BE348688	Hs.162902	Amine oxidase (flavin containing) domain 1	0.14129	0.03612	0.2026	-2.58471
NM_004312	Hs.308	Arrestin 3, retinal (X-arrestin)	0.27434	0.11749	0.0218	-2.58471
AI208802	Hs.519855	Chromosome 6 open reading frame 201	0.26598	0.08736	0.0745	-2.58471
NM_006815	Hs.75914	Coated vesicle membrane protein	0.17603	0.06857	0.0125	-2.58471
AL832107	Hs.501345	C-terminal binding protein 2	0.18556	0.08326	0.0064	-2.58471
NM_152340	Hs.459699	Hypothetical protein FLJ39075	0.42291	0.13844	0.0093	-2.58471
AF131783	Hs.483948	Hypothetical protein LOC163404	0.17238	0.05865	0.0926	-2.58471
AI814405	Hs.482605	Junction-mediating and regulatory protein	0.18233	0.06297	0.0284	-2.58471
NM_002122	Hs.555872	Major histocompatibility complex, class II, DQ alpha 1	0.23417	0.12641	0.0745	-2.58471
AI677835	Hs.452398	MRNA; cDNA DKFZp564E143 (from clone DKFZp564E143)	0.11082	0.16135	0.0469	-2.58471
BE858593	Hs.516471	Nck-associated protein 5	0.12888	0.06198	0.0469	-2.58471
AB035356	Hs.468505	Neurexin 1	0.12183	0.04615	0.1141	-2.58471
NM_018092	Hs.444046	Neuropilin (NRP) and tolloid (TLL)-like 2	0.18599	0.0845	0.0367	-2.58471
BM728509	Hs.481927	Nipped-B homolog (Drosophila)	0.13848	0.08903	0.2627	-2.58471
AW270105	Hs.144309	Polycomb group ring finger 3	0.22062	0.10183	0.0367	-2.58471
AK025631	Hs.439153	Polymerase (DNA directed), eta	0.26953	0.12233	0.0218	-2.58471
BF438357	Hs.444403	Protein phosphatase 1, regulatory (inhibitor) subunit 12B	0.13495	0.05257	0.1688	-2.58471
BF102683	Hs.252451	Sema domain, immunoglobulin domain (Ig), short basic domain, secreted, (semaphorin) 3A	0.13774	0.06163	0.0284	-2.58471
BC013929	Hs.38085	Similar to RIKEN cDNA 0610008P16 gene	0.08429	0.04577	0.0569	-2.58471
AI374911	Hs.387405	Transcribed locus	0.11026	0.04355	0.0367	-2.58471
W60647	Hs.27278	Transcribed locus, weakly similar to XP_497870.1 PREDICTED: similar to PPIA protein [Homo sapiens]	0.2744	0.12015	0.0093	-2.58471
AI672553	Hs.371240	A kinase (PRKA) anchor protein (gravin) 12	0.35211	0.27845	0.0926	-2.56685
NM_017843	Hs.381178	Breast carcinoma amplified sequence 4	0.27058	0.13775	0.0069	-2.56685
AW418562	Hs.446123	Capping protein (actin filament) muscle Z-line, alpha 2	0.10226	0.04222	0.1394	-2.56685
AF086444	Hs.384585	Full length insert cDNA clone ZD81E01	0.23637	0.08866	0.0284	-2.56685
BU928170	Hs.130074	Homo sapiens, clone IMAGE:2905626, mRNA	0.21675	0.12461	0.0367	-2.56685
AK095156	Hs.363603	Hypothetical protein LOC283392	0.2451	0.12213	0.0218	-2.56685
AF000424	Hs.436066	Leukocyte specific transcript 1	0.22479	0.07109	0.0069	-2.56685
AI733395	Hs.444986	Methionyl aminopeptidase 2	0.126	0.04159	0.1141	-2.56685
U89330	Hs.368281	Microtubule-associated protein 2	0.25757	0.09463	0.0125	-2.56685
BC002535	Hs.279763	Misato	0.35862	0.17379	0.1394	-2.56685
AF070536	Hs.534070	Pp14571	0.16974	0.08393	0.0111	-2.56685
NM_004676	Hs.158343	PTPN13-like, Y-linked	0.30836	0.12249	0.0218	-2.56685
AI733637	Hs.547695	Transcribed locus	0.14051	0.04997	0.0218	-2.56685
NM_001385	Hs.443161	Dihydropyrimidinase	0.09315	0.03672	0.0367	-2.54912
AU127250	Hs.64691	F-box protein 28	0.1559	0.03948	0.0593	-2.54912
NM_018972	Hs.168950	Ganglioside-induced differentiation-associated protein 1	0.14932	0.05551	0.0125	-2.54912
BC022402	Hs.553216	Homo sapiens, clone IMAGE:4696931, mRNA	0.12806	0.0464	0.1394	-2.54912
BC040412	Hs.223803	Homo sapiens, clone IMAGE:5184855, mRNA	0.33255	0.15609	0.0367	-2.54912
BE568184	Hs.369624	Hypothetical protein 15E1.2	0.24398	0.11248	0.0367	-2.54912
AL833615	Hs.458418	KIAA1731 protein	0.07242	0.02887	0.0745	-2.54912
H07100	Hs.479658	Leucine rich repeat containing 7	0.17457	0.09935	0.2026	-2.54912
BE550254	Hs.34851	MRNA; cDNA DKFZp586F0922 (from clone DKFZp586F0922)	0.13432	0.05049	0.2845	-2.54912
AF192523	Hs.512147	NPC1 (Niemann-Pick disease, type C1, gene)-like 1	0.23901	0.13699	0.0284	-2.54912
AA843238	Hs.435342	Step II splicing factor SLU7	0.13747	0.07352	0.1141	-2.54912
AI080614	Hs.509213	Transcribed locus	0.1412	0.04883	0.0367	-2.54912
AU147317	Hs.475392	30 kDa protein	0.16764	0.06223	0.0284	-2.53151
AU147044	Hs.80976	Antigen identified by monoclonal antibody Ki-67	0.79686	0.28696	0.0745	-2.53151
AK025206	Hs.303787	B-cell receptor-associated protein 29	0.13903	0.08586	0.3329	-2.53151
NM_001565	Hs.413924	Chemokine (C-X-C motif) ligand 10	0.23523	0.12861	0.2026	-2.53151
AK026653	Hs.525445	Chromosome 14 open reading frame 168	0.18496	0.08293	0.0284	-2.53151
AL563031	Hs.248119	G protein-coupled receptor 10	0.10122	0.09339	0.7213	-2.53151
BC039503	Hs.62646	Homo sapiens, clone IMAGE:5557975, mRNA	0.15713	0.06124	0.0093	-2.53151
AU147479	Hs.406810	Homo sapiens, Similar to hypothetical protein FLJ20378, clone IMAGE:5262617, mRNA	0.1781	0.09605	0.0593	-2.53151
BC016631	Hs.199360	Homo sapiens, Similar to hypothetical protein PRO1722, clone IMAGE:4706427, mRNA	0.12773	0.08242	0.2026	-2.53151
NM_031211	Hs.444600	LAT1-3TM protein	0.10905	0.40146	0.0125	-2.53151
AW474960	Hs.475319	Leucine rich repeat (in FLII) interacting protein 2	0.14915	0.08283	0.0593	-2.53151
NM_014791	Hs.184339	Maternal embryonic leucine zipper kinase	0.33307	0.12345	0.0745	-2.53151
AJ224170	Hs.268939	Matrin 3	0.25896	0.11016	0.0593	-2.53151
AK023821	Hs.472475	Microtubule-actin crosslinking factor 1	1.63657	0.86123	0.0093	-2.53151
AL080152	Hs.513658	MRNA; cDNA DKFZp434F104 (from clone DKFZp434F104)	0.44318	0.38416	0.3329	-2.53151
NM_004805	Hs.444887	Polymerase (RNA) II (DNA directed) polypeptide D	0.26611	0.10951	0.0469	-2.53151
AI126321	Hs.116318	Transcribed locus	0.18285	0.04465	0.0745	-2.53151
AI761812	Hs.158564	Transcribed locus	0.19029	0.0751	0.0469	-2.53151
BF347758	Hs.280146	Transcribed locus, weakly similar to XP_532989.1 PREDICTED: hypothetical protein XP_532989 [Canis familiaris]	0.1277	0.06314	0.2026	-2.53151
NM_020178	Hs.463466	Carbonic anhydrase X	0.19196	0.06849	0.0284	-2.51403
NM_001838	Hs.370036	Chemokine (C-C motif) receptor 7	0.36371	0.23082	0.0218	-2.51403
AW510632	Hs.546521	Chromosome 6 open reading frame 146	0.21409	0.08967	0.0367	-2.51403
AA062610	Hs.496323	Cysteine-rich hydrophobic domain 1	0.14636	0.05151	0.0593	-2.51403
AU152965	Hs.362702	Hypothetical protein FLJ32745	0.19851	0.10853	0.0926	-2.51403
NM_152665	Hs.479226	Hypothetical protein FLJ40873	0.09733	0.06662	0.2845	-2.51403
AA045204	Hs.145605	Mitogen-activated protein kinase kinase kinase 2	0.169	0.05023	0.0593	-2.51403
NM_016195	Hs.240	M-phase phosphoprotein 1	0.42893	0.20015	0.0218	-2.51403
AB002441	Hs.557748	MRNA from chromosome 5q21-22, clone:LI26	0.44022	0.18777	0.0051	-2.51403
AJ292969	Hs.257341	Salvador homolog 1 (Drosophila)	0.17556	0.08743	0.0367	-2.51403
AF090100	Hs.468878	Similar to BMP2 inducible kinase	0.18362	0.07247	0.0469	-2.51403
AW974910	Hs.436900	Transducin (beta)-like 1Y-linked	0.14039	0.07572	0.0469	-2.51403
AI770166	Hs.113876	Wolf-Hirschhorn syndrome candidate 1	0.22713	0.09382	0.0745	-2.51403
AL136621	Hs.507433	Zinc finger protein 198	0.33302	0.2236	0.0926	-2.51403
BC042681	Hs.446620	Zinc finger protein 547	0.20676	0.08306	0.0166	-2.51403
NM_021155	Hs.278694	CD209 antigen	0.41606	0.23258	0.0367	-2.49666
M87313	Hs.546249	Dystrophia myotonica-protein kinase	0.10438	0.04467	0.0479	-2.49666
NM_002006	Hs.284244	Fibroblast growth factor 2 (basic)	0.0981	0.05125	0.1394	-2.49666
BC005055	Hs.431498	Forkhead box P1	0.16878	0.06965	0.0593	-2.49666
BC033764	Hs.382019	Homo sapiens, clone IMAGE:4183849, mRNA	0.17829	0.09824	0.1394	-2.49666
AW771586	Hs.410316	H-rev107-like protein 5	0.26489	0.11334	0.0051	-2.49666
AI570450	Hs.376281	Hypothetical gene supported by AK095200; BC042853	0.38232	0.29489	0.1141	-2.49666
BC006434	Hs.478465	Hypothetical protein FLJ12748	0.20298	0.12291	0.0926	-2.49666
AK097019	Hs.531560	Hypothetical protein FLJ37549	0.07234	0.03143	0.1141	-2.49666
BE745453	Hs.508757	Hypothetical protein LOC283501	0.18796	0.06431	0.0284	-2.49666
N63551	Hs.501991	Male sterility domain containing 2	0.26616	0.14434	0.0284	-2.49666
AW664850	Hs.171265	Mdm4, transformed 3T3 cell double minute 1, p53 binding protein (mouse)	0.36726	0.1578	0.0051	-2.49666
AI968440	Hs.438709	MEGF10 protein	0.0885	0.0301	0.1141	-2.49666
BE465034	Hs.368296	MGC4707 protein	0.2671	0.11549	0.1141	-2.49666
AF086333	Hs.378505	Motile sperm domain containing 1	0.22371	0.11201	0.0745	-2.49666
AL117488	Hs.367789	MRNA; cDNA DKFZp434M031 (from clone DKFZp434M031)	0.10286	0.0426	0.0166	-2.49666
BC001422	Hs.252820	Placental growth factor, vascular endothelial growth factor-related protein	0.41249	0.16912	0.0125	-2.49666
T91323	Hs.496666	Septin 6	0.30678	0.11354	0.0284	-2.49666
AI191897	Hs.40763	Similar to RIKEN cDNA 2510006C20 gene	0.08632	0.0512	0.2026	-2.49666
NM_004780	Hs.95243	Transcription elongation factor A (SII)-like 1	0.21196	0.10294	0.0166	-2.49666
BC017574	Hs.525063	Uncharacterized hypothalamus protein HT007	0.17894	0.10108	0.1394	-2.49666
U13698	Hs.2490	Caspase 1, apoptosis-related cysteine protease (interleukin 1, beta, convertase)	0.14057	0.26875	0.1688	2.49666
NM_004887	Hs.483444	Chemokine (C-X-C motif) ligand 14	0.95137	0.35473	0.0367	2.49666
NM_001866	Hs.522699	Cytochrome c oxidase subunit VIIb	1.20973	2.15486	0	2.49666
AA767385	Hs.128130	Hypothetical protein LOC157697	0.125	0.25809	0.0069	2.49666
BF592123	Hs.447579	Hypothetical protein LOC339290	0.08564	0.13244	0.3329	2.49666
NM_004867	Hs.17109	Integral membrane protein 2A	0.19135	0.40155	0.0218	2.49666
BE974210	Hs.498455	KIAA0217	0.04875	0.12865	0.0284	2.49666
BC001120	Hs.531081	Lectin, galactoside-binding, soluble, 3 (galectin 3)	2.18351	5.80298	0.0069	2.49666
BC020420	Hs.211225	Neuro-oncological ventral antigen 1	0.0325	0.0603	0.3329	2.49666
AI670903	Hs.497598	Solute carrier family 25, member 29	0.05287	0.09261	0.0166	2.49666
AI810186	Hs.467239	Zinc finger protein 347	0.08158	0.1409	0.0593	2.49666
AA608855	Hs.85603	Down-regulated by Ctnnb1, a	0.14824	0.36272	0.0367	2.51403
NM_001443	Hs.380135	Fatty acid binding protein 1, liver	0.20897	1.49605	0.279	2.51403
NM_003505	Hs.94234	Frizzled homolog 1 (Drosophila)	0.26858	0.52041	0.0469	2.51403
AI246369	Hs.98288	Laeverin	0.06662	0.12036	0.3329	2.51403
AF161387	Hs.522310	N-acetylneuraminic acid synthase (sialic acid synthase)	0.04147	0.10318	0.0093	2.51403
BC001359	Hs.279920	Tyrosine 3-monooxygenase/tryptophan 5-monooxygenase activation protein, beta polypeptide	3.2983	6.11102	0.0001	2.51403
AU146329	Hs.187772	Guanine nucleotide binding protein (G protein), gamma 2	0.07137	0.15173	0.1688	2.53151
AW265065	Hs.434957	Homo sapiens, clone IMAGE:4654429, mRNA	0.08799	0.20073	0.0593	2.53151
NM_006680	Hs.199743	Malic enzyme 3, NADP(+)-dependent, mitochondrial	0.21839	0.42225	0.0367	2.53151
BF509028	Hs.134013	NK6 transcription factor related, locus 2 (Drosophila)	0.49676	1.01271	0.0218	2.53151
AL136756	Hs.183428	Sarcospan (Kras oncogene-associated gene)	0.65951	0.47395	0.0745	2.53151
AK097698	Hs.479099	Sortilin-related VPS10 domain containing receptor 2	2.31891	4.41511	0.0284	2.53151
AL137479	Hs.387396	Two pore segment channel 2	0.90023	0.8671	0.5755	2.53151
AL040051	Hs.434914	Chromosome 14 open reading frame 31	0.03034	0.84029	0.1913	2.54912
M18767	Hs.458355	Complement component 1, s subcomponent	0.50718	0.85995	0.0069	2.54912
NM_002293	Hs.497039	Laminin, gamma 1 (formerly LAMB2)	0.76253	1.44777	0.0069	2.54912
NM_015929	Hs.516235	Lipoyltransferase 1	0.0889	0.2117	0.1141	2.54912
NM_006152	Hs.124922	Lymphoid-restricted membrane protein	0.06886	0.1134	0.2845	2.54912
AW051361	Hs.490551	Ubiquitin associated protein 2-like	0.10669	0.18847	0.0593	2.54912
AF147388	Hs.172028	A disintegrin and metalloproteinase domain 10	0.05088	0.15747	0.2411	2.56685
NM_007168	Hs.58351	ATP-binding cassette, sub-family A (ABC1), member 8	0.21263	0.43397	0.0593	2.56685
NM_001897	Hs.513044	Chondroitin sulfate proteoglycan 4 (melanoma-associated)	0.11136	0.15921	0.2845	2.56685
BF590675	Hs.512743	Hypothetical protein FLJ14281	0.02741	0.09526	0.1141	2.56685
NM_005532	Hs.532634	Interferon, alpha-inducible protein 27	0.0396	0.97806	0.0069	2.56685
NM_007035	Hs.125750	Keratocan	0.11285	0.13074	0.3329	2.56685
NM_004142	Hs.528670	Matrix metalloproteinase-like 1	0.13855	0.27182	0.0745	2.56685
M33376	Hs.460260	Aldo-keto reductase family 1, member C2 (dihydrodiol dehydrogenase 2; bile acid binding protein; 3-alpha hydroxysteroid dehydrogenase, type III)	0.38504	0.89174	0	2.58471
NM_001870	Hs.646	Carboxypeptidase A3 (mast cell)	0.27266	0.38378	0.1394	2.58471
BF341845	Hs.529862	Casein kinase 1, alpha 1	0.0361	0.09705	0.1688	2.58471
BC004884	Hs.458713	Fucosyltransferase 10 (alpha (1,3) fucosyltransferase)	0.03994	0.08747	0.1394	2.58471
J05594	Hs.77348	Hydroxyprostaglandin dehydrogenase 15-(NAD)	0.14129	0.23136	0.0051	2.58471
AW136397	Hs.207069	Hypothetical LOC389362	0.09188	0.1691	0.1141	2.58471
AI742901	Hs.499793	Phosphatidylinositol glycan, class L	0.0425	0.10091	0.0218	2.58471
AA989220	Hs.254006	Protein geranylgeranyltransferase type I, beta subunit	0.12652	0.23307	0.0593	2.58471
NM_019848	Hs.522826	Solute carrier family 10 (sodium/bile acid cotransporter family), member 3	0.18395	0.32245	0.1141	2.58471
BC004288	Hs.521064	Zinc finger protein 655	0.24939	0.48974	0.0593	2.58471
AF217092	Hs.506374	13kDa differentiation-associated protein	0.55308	0.29665	0.0093	2.60268
AF349114	Hs.523443	Hemoglobin, beta	0.24252	0.83248	0.1141	2.60268
AA187325	Hs.55041	Mitochondrial ribosomal protein L2	0.15658	0.25859	0.0926	2.60268
N57797	Hs.553722	UDP-N-acetyl-alpha-D-galactosamine:polypeptide N-acetylgalactosaminyltransferase 10 (GalNAc-T10)	0.06243	0.11495	0.1688	2.60268
NM_005588	Hs.179704	Meprin A, alpha (PABA peptide hydrolase)	0.05333	0.13481	0.0745	2.62079
NM_021114	Hs.98243	Serine protease inhibitor, Kazal type 2 (acrosin-trypsin inhibitor)	0.09724	0.31372	0.0745	2.62079
AV728268	Hs.368592	Sortilin-related receptor, L(DLR class) A repeats-containing	0.6414	1.17023	0.0367	2.62079
NM_004615	Hs.441664	Tetraspanin 7	0.32971	0.79595	0.0051	2.62079
AL562528	Hs.163776	Ubiquitin-conjugating enzyme E2, J1 (UBC6 homolog, yeast)	0.222	0.32464	0.0469	2.62079
AF230337	Hs.57813	Zinc ribbon domain containing, 1	0.16329	0.27143	0.1141	2.62079
M63310	Hs.480042	Annexin A3	0.29474	0.51967	0.0469	2.63902
NM_014810	Hs.413045	Centrosome-associated protein 350	0.29252	0.45189	0.4446	2.63902
AL120021	Hs.407709	DRE1 protein	0.28488	0.14066	0.0284	2.63902
AL049329	Hs.128384	Hypothetical protein FLJ13946	0.74039	0.96076	0.1688	2.63902
AB007935	Hs.171057	Immunoglobulin superfamily, member 3	0.39332	0.73355	0.0284	2.63902
NM_001613	Hs.500483	Actin, alpha 2, smooth muscle, aorta	2.74567	7.48349	0.0051	2.65737
NM_001353	Hs.460260	Aldo-keto reductase family 1, member C2 (dihydrodiol dehydrogenase 2; bile acid binding protein; 3-alpha hydroxysteroid dehydrogenase, type III)	4.27821	8.45593	0.0005	2.65737
AK024482	Hs.520623	Chromosome 7 open reading frame 27	0.91741	2.23163	0.0051	2.65737
NM_001863	Hs.431668	Cytochrome c oxidase subunit Vib polypeptide 1 (ubiquitous)	0.54923	1.31466	0.0166	2.65737
AI440266	Hs.170673	Epidermal retinal dehydrogenase 2	0.44453	0.5623	0.0218	2.65737
NM_012134	Hs.519075	Leiomodin 1 (smooth muscle)	0.27844	0.47987	0.1141	2.65737
M13577	Hs.551713	Myelin basic protein	0.04958	0.12285	0.0367	2.65737
AF044221	Hs.145575	Ubiquitin-like 3	0.42507	0.36472	0.0745	2.65737
AI349506	Hs.149363	Chromosome 18 open reading frame 1	0.10526	0.1995	0.1394	2.67586
AF126782	Hs.59719	Dehydrogenase/reductase (SDR family) member 7	0.67315	0.08835	0.0069	2.67586
L35594	Hs.190977	Ectonucleotide pyrophosphatase/phosphodiesterase 2 (autotaxin)	0.85986	0.78635	0.0284	2.67586
BC030089	Hs.382140	Homo sapiens, clone IMAGE:4792986, mRNA	0.03225	0.0545	0.3329	2.67586
NM_000235	Hs.127445	Lipase A, lysosomal acid, cholesterol esterase (Wolman disease)	0.70153	0.90296	0.2026	2.67586
AL044175	Hs.494538	Patched homolog (Drosophila)	0.39	0.42212	0.9594	2.67586
AW081982	Hs.445045	Transcribed locus	0.16196	0.39803	0.0166	2.67586
AI587323	Hs.298280	ATP synthase, H+ transporting, mitochondrial F1 complex, alpha subunit, isoform 1, cardiac muscle	0.16701	0.2247	0.0593	2.69447
AK000271	Hs.439481	Homo sapiens, clone IMAGE:5215917, mRNA	0.18259	0.29185	0.0926	2.71321
NM_002305	Hs.445351	Lectin, galactoside-binding, soluble, 1 (galectin 1)	0.33875	0.70836	0.0019	2.71321
NM_002371	Hs.80395	Mal, T-cell differentiation protein	1.4441	3.70838	0.0051	2.71321
NM_003122	Hs.407856	Serine protease inhibitor, Kazal type 1	9.4005	2.8262	0.0051	2.71321
AI743605	Hs.504390	Hypothetical protein LOC283177	0.94453	2.46171	0.0926	2.73208
NM_003247	Hs.371147	Thrombospondin 2	0.09981	0.14463	0.3863	2.73208
NM_000313	Hs.64016	Protein S (alpha)	0.54635	0.96645	0.0367	2.75108
BC014344	Hs.383050	Similar to esterase/N-deacetylase (EC 3.5.1.-), 50K hepatic - rabbit	0.04856	0.14895	0.0367	2.75108
NM_005822	Hs.440168	Down syndrome critical region gene 1-like 1	0.26647	0.50378	0.1141	2.77022
NM_005665	Hs.387251	Ecotropic viral integration site 5	0.19058	0.32764	0.2026	2.77022
AK096055	Hs.208067	Hypothetical protein FLJ38736	0.18271	0.3601	0.0218	2.77022
BF718769	Hs.36587	Protein phosphatase 1, regulatory subunit 7	0.09012	0.16634	0.1688	2.77022
BF110993	Hs.279640	Translocated promoter region (to activated MET oncogene)	0.16051	0.24221	0.2026	2.77022
AK026857	Hs.523456	Mitochondrial ribosomal protein L17	0.27483	0.62333	0.0284	2.78949
AF237905	Hs.150878	Membrane-spanning 4-domains, subfamily A, member 8B	0.43985	0.06264	0.0069	2.80889
NM_003182	Hs.2563	Tachykinin, precursor 1 (substance K, substance P, neurokinin 1, neurokinin 2, neuromedin L, neurokinin alpha, neuropeptide K, neuropeptide gamma)	0.08744	0.1345	0.1141	2.80889
BE963437	Hs.510213	Tetratricopeptide repeat domain 7B	0.07424	0.15923	0.0745	2.80889
BC001386	Hs.133527	Transmembrane 4 L six family member 4	0.03967	0.4917	0.0926	2.80889
AI457588	Hs.77348	Hydroxyprostaglandin dehydrogenase 15-(NAD)	0.362	0.35049	0.0166	2.8481
NM_018145	Hs.511067	Hypothetical protein FLJ10579	0.17368	0.38101	0.0469	2.8481
AF130054	Hs.471779	Leucine rich repeat (in FLII) interacting protein 1	0.09555	0.17694	0.0367	2.8481
NM_013379	Hs.37916	Dipeptidylpeptidase 7	0.182	0.47667	0.0166	2.86791
BC001745	Hs.518595	DNA segment on chromosome 4 (unique) 234 expressed sequence	0.30021	0.66446	0.0284	2.86791
BC001252	Hs.162996	Dymeclin	0.16448	0.32194	0.0166	2.86791
BC018690	Hs.533953	KIAA1462	0.0507	0.13139	0.0593	2.86791
NM_016644	Hs.157461	Mesenchymal stem cell protein DSC54	0.08642	0.17274	0.0593	2.86791
U40763	Hs.470544	Peptidyl-prolyl isomerase G (cyclophilin G)	0.18426	0.31771	0.0469	2.86791
AV729086	Hs.556067	Proteasome (prosome, macropain) subunit, alpha type, 3	0.06909	0.11232	0.0745	2.86791
NM_002736	Hs.433068	Protein kinase, cAMP-dependent, regulatory, type II, beta	0.12535	0.20778	0.1141	2.86791
NM_005410	Hs.275775	Selenoprotein P, plasma, 1	0.24309	0.03721	0.0093	2.86791
U90902	Hs.517228	T-cell lymphoma invasion and metastasis 1	0.16865	0.26827	0.1394	2.86791
AI761712	Hs.552810	Transcribed locus, weakly similar to XP_498459.1 PREDICTED: hypothetical protein XP_498459 [Homo sapiens]	0.03671	0.08483	0.0218	2.86791
NM_001759	Hs.376071	Cyclin D2	0.35429	0.79524	0.0051	2.88786
W60800	Hs.196952	Hepatic leukemia factor	0.16728	0.33893	0.0093	2.88786
AW301641	Hs.369017	RAB2, member RAS oncogene family	0.03875	0.07501	0.1141	2.88786
AF092128	Hs.446450	Integral membrane protein 2B	0.48727	0.68929	0.0051	2.90795
AW263497	Hs.97774	Synaptotagmin-like 5	1.63678	3.1579	0.0367	2.90795
NM_004424	Hs.513268	E4F transcription factor 1	0.13757	0.30824	0.0284	2.92817
BF512803	Hs.298250	Methionine aminopeptidase 1D	0.07695	0.16913	0.0367	2.92817
NM_002493	Hs.493668	NADH dehydrogenase (ubiquinone) 1 beta subcomplex, 6, 17kDa	0.2173	0.56855	0.0218	2.92817
BC001104	Hs.507537	Nucleoporin like 1	0.05998	0.2026	0.1141	2.92817
NM_015983	Hs.19196	Ubiquitin-conjugating enzyme E2D 4 (putative)	0.15469	0.32668	0.0469	2.92817
M98399	Hs.120949	CD36 antigen (collagen type I receptor, thrombospondin receptor)	0.11962	0.28795	0.0166	2.94854
AU146204	Hs.297814	Ectonucleotide pyrophosphatase/phosphodiesterase 6	0.05942	0.14561	0.0469	2.94854
BF676980	Hs.271264	Glutamate-cysteine ligase, catalytic subunit	0.16729	0.29728	0.0093	2.94854
AA744682	Hs.444360	RAB, member of RAS oncogene family-like 3	0.06905	0.18469	0.0069	2.94854
AF141347	Hs.524395	Tubulin, alpha 3	0.65589	0.11805	0.0051	2.94854
NM_000560	Hs.443057	CD53 antigen	0.35261	0.71406	0.0125	2.96905
NM_022844	Hs.460109	Myosin, heavy polypeptide 11, smooth muscle	0.8995	0.10497	0.0218	2.96905
NM_014624	Hs.275243	S100 calcium binding protein A6 (calcyclin)	1.04355	4.09778	0.0002	2.96905
AI733428	Hs.129003	Transcribed locus	0.01708	0.04947	0.0593	2.96905
NM_031210	Hs.324521	Chromosome 14 open reading frame 156	0.36985	0.80824	0.0218	2.9897
NM_003159	Hs.435570	Cyclin-dependent kinase-like 5	0.08511	0.176	0.0218	2.9897
NM_145208	Hs.133912	Methyl-CpG binding domain protein 3-like 1	0.03463	0.14169	0.0218	2.9897
NM_006134	Hs.433668	Chromosome 21 open reading frame 4	0.11503	0.21259	0.0593	3.01049
NM_001001	Hs.444749	Ribosomal protein L36a-like	0.80095	1.76541	0.0069	3.01049
NM_003254	Hs.522632	Tissue inhibitor of metalloproteinase 1 (erythroid potentiating activity, collagenase inhibitor)	0.07994	0.17098	0.1141	3.01049
NM_005213	Hs.518198	Cystatin A (stefin A)	0.80198	0.61416	0.0051	3.03143
NM_017933	Hs.409352	Hypothetical protein FLJ20701	0.3117	0.62068	0.0926	3.03143
BF339845	Hs.180663	KIAA1586	0.04584	0.12535	0.0593	3.03143
NM_024076	Hs.221873	Potassium channel tetramerisation domain containing 15	0.1023	0.31709	0.0166	3.03143
BG567552	Hs.508514	Serine/threonine kinase 24 (STE20 homolog, yeast)	0.05438	0.12348	0.0166	3.03143
AI636775	Hs.520207	Acyl-Coenzyme A binding domain containing 3	0.30157	0.24168	0.0926	3.05252
NM_004267	Hs.8786	Carbohydrate (N-acetylglucosamine-6-O) sulfotransferase 2	0.16838	0.35336	0.0051	3.05252
NM_017676	Hs.24088	Hypothetical protein FLJ20125	0.05125	0.13064	0.0593	3.05252
BE260771	Hs.516671	Keratinocyte associated protein 2	0.18233	0.5544	0.0166	3.05252
AL109688	Hs.383921	MRNA full length insert cDNA clone EUROIMAGE 131775	0.23566	0.18602	0.2411	3.05252
NM_003206	Hs.78061	Transcription factor 21	0.24482	0.50103	0.0284	3.05252
AI300571	Hs.547576	Full-length cDNA clone CS0DJ002YF02 of T cells (Jurkat cell line) Cot 10-normalized of Homo sapiens (human)	0.09813	0.27852	0.0051	3.07375
BF516429	Hs.314437	Hypothetical protein LOC255326	0.11005	0.26186	0.0926	3.07375
NM_000129	Hs.335513	Coagulation factor XIII, A1 polypeptide	0.30049	1.02011	0.0125	3.09513
AF246144	Hs.36794	Cyclin D-type binding-protein 1	0.46679	0.07774	0.0051	3.09513
NM_016831	Hs.533339	Period homolog 3 (Drosophila)	0.58145	1.04394	0.0745	3.09513
BC032628	Hs.475565	Zinc finger, FYVE domain containing 20	0.07876	0.15714	0.0593	3.09513
AI984229	Hs.512973	Butyrate-induced transcript 1	0.76017	2.23767	0.0051	3.11666
NM_024111	Hs.155569	Hypothetical protein MGC4504	0.35512	0.18031	0.0745	3.11666
AF089868	Hs.511397	Melanoma cell adhesion molecule	0.14419	0.39547	0.0051	3.11666
AI860568	Hs.268874	Family with sequence similarity 20, member A	0.04632	0.16025	0.0166	3.13834
BC001872	Hs.525648	Immunoglobulin heavy constant mu	0.2969	0.9877	0.0069	3.13834
AI079544	Hs.551611	LIM domain containing preferred translocation partner in lipoma	0.13209	0.27573	0.0166	3.13834
NM_002489	Hs.50098	NADH dehydrogenase (ubiquinone) 1 alpha subcomplex, 4, 9kDa	1.01408	2.37288	0.0093	3.13834
BC041094	Hs.270621	TAF5-like RNA polymerase II, p300/CBP-associated factor (PCAF)-associated factor, 65kDa	0.10909	0.22244	0.0745	3.13834
AF313911	Hs.435136	Thioredoxin	0.45799	0.30354	0.0022	3.13834
AV681579	Hs.84084	Amyloid beta precursor protein (cytoplasmic tail) binding protein 2	0.21997	0.42859	0.0051	3.16017
AF164794	Hs.146668	Tumor differentially expressed 2	0.0964	0.2018	0.0069	3.16017
NM_002178	Hs.274313	Insulin-like growth factor binding protein 6	0.23401	0.54736	0.0051	3.18215
U22178	Hs.255462	Microseminoprotein, beta-	2.2161	4.64104	0.0367	3.18215
NM_001957	Hs.183713	Endothelin receptor type A	0.10485	0.21244	0.1141	3.22657
AI802768	Hs.116448	Glutaminase	0.07455	0.15852	0.1394	3.22657
AF313413	Hs.29444	Putative small membrane protein NID67	0.20063	0.4561	0.0093	3.22657
NM_013352	Hs.486292	Squamous cell carcinoma antigen recognized by T cells 2	0.12002	0.28385	0.0051	3.22657
AW015083	Hs.12827	CDNA clone IMAGE:5260726, partial cds	0.06129	0.14378	0.0469	3.29436
AY034469	Hs.375752	Clone BGL1 mRNA sequence	0.04778	0.14767	0.0125	3.29436
BF059479	Hs.50802	Hypothetical protein FLJ14712	0.04869	0.16293	0.0367	3.29436
AI674647	Hs.401537	Signal peptide peptidase-like 2A	0.14371	0.08995	0.0051	3.29436
NM_002985	Hs.514821	Chemokine (C-C motif) ligand 5	0.31232	0.63401	0.0284	3.31728
AF112857	Hs.408658	Cyclin E2	0.05982	0.14389	0.0745	3.31728
AW291369	Hs.268874	Family with sequence similarity 20, member A	0.28451	0.58257	0.0218	3.31728
AI188161	Hs.533710	Fibronectin leucine rich transmembrane protein 2	0.04789	0.10818	0.0745	3.31728
NM_002407	Hs.97644	Secretoglobin, family 2A, member 1	2.78176	8.02895	0.0051	3.31728
NM_001048	Hs.12409	Somatostatin	0.44183	1.60813	0.0051	3.34035
AB003476	Hs.371240	A kinase (PRKA) anchor protein (gravin) 12	0.13123	0.30904	0.0218	3.36359
NM_012342	Hs.533336	BMP and activin membrane-bound inhibitor homolog (Xenopus laevis)	0.33891	0.94018	0.0051	3.36359
U63296	Hs.77348	Hydroxyprostaglandin dehydrogenase 15-(NAD)	0.17358	0.48125	0.0051	3.41054
BF382393	Hs.324271	N-acyl-phosphatidylethanolamine-hydrolyzing phospholipase D	0.29917	0.46804	0.0745	3.41054
NM_005694	Hs.534383	COX17 homolog, cytochrome c oxidase assembly protein (yeast)	0.76196	0.33934	0.0367	3.43426
NM_016261	Hs.463638	Tubulin, delta 1	0.05165	0.12093	0.0745	3.4822
AA680302	Hs.449585	Immunoglobulin lambda variable 3-21	1.1868	7.21275	0.0125	3.50642
AW630250	Hs.132161	Forkhead box K2	0.03327	0.07585	0.0469	3.53081
BF437011	Hs.495128	Protein phosphatase 6, catalytic subunit	0.05402	0.10398	0.2411	3.55537
BG476669	Hs.454528	Vacuolar protein sorting 35 (yeast)	0.20586	0.55675	0.0125	3.55537
AV707102	Hs.8364	Pyruvate dehydrogenase kinase, isoenzyme 4	0.06537	0.1537	0.1141	3.63008
AF061735	Hs.514465	ATP synthase, H+ transporting, mitochondrial F0 complex, subunit d	0.44225	0.17781	0.0166	3.68075
NM_000846	Hs.94107	Glutathione S-transferase A2	0.21245	0.86651	0.0125	3.68075
NM_002731	Hs.487325	Protein kinase, cAMP-dependent, catalytic, beta	0.11868	0.24261	0.0125	3.70635
N21458	Hs.38621	Sorbin and SH3 domain containing 1	0.21879	0.60136	0.0051	3.70635
AA910852	Hs.390568	Zinc finger protein 585A	0.03006	0.11335	0.0745	3.70635
AF044954	Hs.513266	NADH dehydrogenase (ubiquinone) 1 beta subcomplex, 10, 22kDa	0.08662	0.34105	0.0284	3.73213
NM_005142	Hs.110014	Gastric intrinsic factor (vitamin B synthesis)	0.18047	0.55729	0.0593	3.75809
BQ717575	Hs.123034	G protein-coupled receptor 12	0.05223	0.21218	0.0367	3.78423
NM_002567	Hs.433863	Prostatic binding protein	0.1465	0.39089	0.0593	3.78423
AI827789	Hs.100686	Breast cancer membrane protein 11	0.12024	0.25042	0.0926	3.81055
NM_030932	Hs.508141	Diaphanous homolog 3 (Drosophila)	0.05222	0.10926	0.0593	3.81055
AI718937	Hs.109438	Potassium channel tetramerisation domain containing 12	0.15998	0.12832	0.0284	3.81055
BF593660	Hs.478729	Transmembrane protein 44	0.02705	0.11699	0.0093	3.86375
W72338	Hs.304249	UDP-glucose ceramide glucosyltransferase	0.1984	0.43852	0.0125	3.86375
D13665	Hs.136348	Periostin, osteoblast specific factor	0.13871	0.00492	0.0051	3.94493
NM_004684	Hs.62886	SPARC-like 1 (mast9, hevin)	0.70085	0.74524	0.0125	3.94493
BF195634	Hs.390650	Similar to High mobility group protein 4 (HMG-4) (High mobility group protein 2a) (HMG-2a)	0.03556	0.18499	0.0051	4
NM_002145	Hs.514289	Homeo box B2	0.14772	0.35914	0.0367	4.08405
X03348	Hs.122926	Nuclear receptor subfamily 3, group C, member 1 (glucocorticoid receptor)	0.18132	0.49925	0.0069	4.08405
NM_000014	Hs.212838	Alpha-2-macroglobulin	0.48861	1.49666	0.0069	4.14106
NM_016323	Hs.26663	Hect domain and RLD 5	0.32993	0.6879	0.0166	4.14106
NM_017680	Hs.435655	Asporin (LRR class 1)	0.1777	0.49563	0.0367	4.28709
BC040884	Hs.434635	Homo sapiens, clone IMAGE:5735420, mRNA	0.18642	0.39687	0.0166	4.46915
H14374	Hs.386162	Similar to zinc finger protein 92 (HTF12)	0.02035	0.11653	0.0367	4.46915
AJ388663	Hs.383932	Ig lambda chain V-region (VL-MAL)	0.2087	1.37472	0.0125	4.53154
AW575927	Hs.449621	Immunoglobulin kappa constant	2.55822	4.4973	0.0002	4.53154
NM_002933	Hs.78224	Ribonuclease, RNase A family, 1 (pancreatic)	0.58603	2.73144	0.0069	4.72397
AW188940	Hs.534255	Beta-2-microglobulin	0.48993	1.70227	0.0093	4.92458
AL575922	Hs.111779	Secreted protein, acidic, cysteine-rich (osteonectin)	0.27426	1.07442	0.0051	5.16941
BG231551	Hs.525906	Similar to hypothetical protein DKFZp434P0316	0.10279	0.32071	0.0051	5.38893
NM_000130	Hs.30054	Coagulation factor V (proaccelerin, labile factor)	0.11319	0.43011	0.0051	5.50217
BC005170	Hs.437582	MCM8 minichromosome maintenance deficient 8 (S. cerevisiae)	0.06057	0.23541	0.0051	5.50217
NM_000704	Hs.36992	ATPase, H+/K+ exchanging, alpha polypeptide	0.09232	4.81861	0.0745	6.49802
AF348514	Hs.546499	Prothymosin, alpha (gene sequence 28)	0.40056	0.98249	0.0069	6.58873
AI821357	Hs.16757	Down-regulated in gastric cancer GDDR	1.73068	3.95074	0.0069	7.06162
NM_018658	Hs.463985	Potassium inwardly-rectifying channel, subfamily J, member 16	0.42159	1.28944	0.0284	8.63383
